# Supplementary material for: Parental investment matters for maternal and offspring immune defense in the mouthbrooding cichlid Astatotilapia burtoni
Source: PubMed Central journal article supplement (PMC5738712; doi:10.1186/s12862-017-1109-6), 2017-12-20
Supplement: 12862_2017_1109_MOESM1_ESM.pdf [file 12862_2017_1109_MOESM1_ESM.pdf]

**S1 Table: List of all primers used for candidate gene expression:**

| Primer Name | Gene Name                                | Sequence                |                          |                       |
|-------------|------------------------------------------|-------------------------|--------------------------|-----------------------|
|             |                                          | Forward                 | Reverse                  |                       |
| CD29        | Fibronectin beta antigen CD29            | CCTGCCTCCCTCAACAGTTATG  | GTAGGACAGGATGGGGATGTTT   |                       |
| CD8         | Fibronectin beta antigen CD82            | CAGTAAAGACAGCGCCATCAAG  | GTAGGACATAAGGTGGTGGCAA   |                       |
| igl         | Immunoglobulin light chain               | TTGGTGCCAATGTCAGAATCCT  | TCTGGCTGATCAAATCCCCTG    |                       |
| Il10        | Interleukin 10                           | TGGAATTTTACCTGGACACGGT  | CTGGGTGACATCTCTCTCAGG    |                       |
| integrin a2 | Integrin alpha 2                         | TGGAAGCTAGGCATTTTACTGGA | CAAAGTCAGTGCAAATACTCCACA |                       |
| MHC1        | MHC I antigen F10                        | GTGGTTGTTGGGATGGTTGATG  | CTGATCTGTGTTCTGGCAAAC    |                       |
| MHC2b       | Major histocompatibility complex II beta | AATCACCATCTGCCATCTCCTC  | GCCCTATGTCAAACCTCACTCC   |                       |
| LCP         | Lymphocyte cytosolic factor I            | TGATGGCAATGCTACCTTGACT  | GTTCAACCAGCGTACAATGATG   |                       |
| FcGr2A      | Fc fragment of IgL                       | CCACAAAGGTGAAACTGACCC   | AGGCTCTTGTGTACGTGTGG     |                       |
| AIF         | Allograph inflammation factor            | GAGGTGTTGGAAGTAGCTCAA   | TGCCATGCCTTCAAACATCAAG   |                       |
| F2RL1       | coagulation factor II (Thrombin)         | TGGCAATCTGGGTCTTTCTCTT  | CATAGATCCAGTTGTTGCCGTT   |                       |
| chemokine   | Chemokine receptor 9                     | CCTTTGTGGTCTGCACGATGG   | GATCTTCGGCACCTCCCTCT     |                       |
| lectine     | Lectine                                  | TCTGCTTGGATCACAGTGGTAC  | TCCACCTGCTGTAAAGTCTCAC   |                       |
| TNFb        | Tumor necrose factor beta                | CCAGAGATGGCTTGTACAGTGT  | TGTGGATCGATGAGAGGAGAGT   |                       |
| catalase    | Catalase                                 | CGCTGAACAAGAAAGACACCTG  | CCATCCTTCATCCATTCCCAGA   |                       |
| copzidis    | Copper zink dismutase                    | TGTTGCCAAGATTGACATCACG  | CGGTCTTCAGGCTCTCTTCATT   |                       |
| FDF6        | Trypsin I                                | GTCTCTGAACTCTGGCTACCAC  | CTCAGTCCCTCATTGACCGAA    |                       |
| Calret 3    | Calreticulin 3                           | TCTGGGAGTCTGGAGGATGATT  | GTCCTCAGGCTTTGTGCTACTA   |                       |
| Calret 1    | Calreticulin 1                           | ATGAGATGGATGGAGAGTGGGA  | GGTTGTCAATCTCAGGGTGGAT   |                       |
| FAM 60A     | FAM 60 A Protein                         | GCCAGATCAACAGGCTTCAG    | CTGTGGGCATCTGAGTTGTG     |                       |
| ptx4        | Pentraxin 4                              | GAACCATGCAGAAGAGGTCAGA  | CATGGAGTTGGTCTGGCTTAGT   |                       |
| SAA         | Serum amyloid A                          | CCCAATTGAAGCAGCTAAAGGG  | TGTGCAGCATCAGAGTTTCT     |                       |
| C1q         | Complement component 1q                  | CAAACATTCCCTGGTGTTCGAC  | TGTTGAGGTTGTAGCTCGTCTC   |                       |
| C9          | Complement component 9                   | GACGAAGGTAAGGCTGAAGGAA  | AAGGTCCATCACTCCATCCCTA   |                       |
| hepcidin    | Hepcidin                                 | GGAGCCAATGAGCATGGACTAT  | CTCAGAACCTGCAGCAAATTCC   |                       |
| lat2        | Latescidin 2                             | CGTCGTGCTCACATTCATTTGT  | ACGCTTGTGTCTGCTCGTTATA   |                       |
| PCSK2       | Proprotein convertase subtilisin         | GGAGAAGGGCTCTTTCACCT    | GTTGATGACATTCTTACCCTT    | Baldo et al. 2011     |
| EF1         | Elongation Factor 1                      | GCCCCTGCAGGACGTCTA      | CGGCCGACGGGTACAGT        | Colombo et al. 2013   |
| rspa3       | Ribosomal protein A3                     | AGACCAATGACCTGAAGGAAGTG | TCTCGATGTCCTTGCCAACA     | Colombo et al. 2013   |
| ArA         | Androgen receptor A                      | CGCTGTATCTGGTACGGTAG    | TGAGGAATCGCACTTGG        | Diepeveen et al. 2013 |

|          |                                              |                         |                        |                       |
|----------|----------------------------------------------|-------------------------|------------------------|-----------------------|
| ArB      | Androgen receptor B                          | TTCGGCGACAAGTACAACCTC   | ACTGTTACGGCGCATTAA     | Diepeveen et al. 2013 |
| AromB    | Aromatase B                                  | TGGAGGAGATGAACACCGTCT   | TGTCGTTGCTCCAGAGCTT    | Diepeveen et al. 2013 |
| dmap1    | DNA methyltransferase 1                      | AGTACCAAATGCATCTCCACGA  | TTGCTGGTGATCATATCGGTCA |                       |
| HA_PCAF  | histone acetyltransferase                    | GGTTGCATTTTTGTGACCTCTCC | ACAAACGGAGGATCAGACATGG |                       |
| HD_AC1   | Histone deacetylase                          | ATGGCGCTTACTTCTCAAGGAA  | TCGCTTTGTGTGGACGGTATAT |                       |
| HDem_TRP | Histone demethylase                          | GTTCGCTTGGGTGACACAATTA  | ACAAAGTGGTATCGTGCAGCTA |                       |
| EHMT2    | Euchromatic histone lysine methyltransferase | ACTACAGTCGTCACCATGTCTG  | CTGACAGGTCTTTCAGGCATCT |                       |
| LSDM     | Lysine specific demethylase                  | GCGAATACAACGGCTCAATGAG  | CAAACACCACCTCTTCGTTTAC |                       |
| MRFs     | Myogenic regulatory factors                  | CACAGCTTCCAATCCAAACCAG  | GCTTCCTGAGTCACTCCCATAG |                       |
| egr1     | Early growth response 1                      | TATACAGGCAGCTTACCCTTG   | AGGAGGATGAGATGGTCTGTGA |                       |
| ghrh     | Growth hormone releasing hormone             | TGCCAGAAAGTTCCTTCAGACA  | ATTTCTCTGGATGGCTGTGAGG |                       |
| opn1sw   | Opsin 1                                      | CACTTCCACCTGTACGAGAACA  | CGCCACGAGAACAATGAAGTTT |                       |
| HSP70    | Heat shock protein 70                        | AGTTTCATGGCAGGGCATTTC   | TCCTCCTCCATGTACATCACCT |                       |
| HSP90    | Heat shock protein 90                        | ACATTATGGAGGAGGAGGTGGA  | AGGACTCAAGTTTGGTGGGATC |                       |
| CR       | Cortisol receptor                            | ATGCTGGCAGAGATCATTTCCA  | AAGGGACGGGATTTAAGGCATT |                       |
| HSP60    | Heat shock protein 60                        | ACCATCATCAACGAGCTGAAGA  | ATGCAGAGTCTTCCCATCCTTG |                       |
| ADNPB    | activity-dependent neuroprotector homeobox   | CGTCGAGAATGGTTTTGGACC   | GTTCTTGCTGATGATGGGAC   | Baldo et al. 2011     |
| HIVEP3b  | Hivep 3b                                     | CCAGACAGCCACAGCAACAA    | CCCCACATGTTCCACATTCA   | Diepeveen et al. 2013 |

Baldo L, Santos ME, Salzburger W. Comparative transcriptomics of eastern African cichlid fishes shows signs of positive selection and a large contribution of untranslated regions to genetic diversity. *Genome Biol Evol.* 2011;3(1):443–55.

Colombo M, Diepeveen ET, Muschick M, Santos ME, Indermaur A, Boileau N et al. The ecological and genetic basis of convergent thick-lipped phenotypes in cichlid fishes. *Mol Ecol.* 2013;22;670-684

Diepeveen ET, Roth O, Salzburger W. Immune-Related Functions of the Hivep Gene Family in East African Cichlid Fishes. *G3 (Bethesda).* 2013 Oct 18;
