# Supplementary material for: Parental investment matters for maternal and offspring immune defense in the mouthbrooding cichlid Astatotilapia burtoni
Source: PubMed Central journal article supplement (PMC5738712; doi:10.1186/s12862-017-1109-6), 2017-12-20
Supplement: 12862_2017_1109_MOESM2_ESM.pdf [file 12862_2017_1109_MOESM2_ESM.pdf]

**S2 Table: ANCOVA on candidate genes from brooding versus non-brooding females:**  
 Univariate analysis following significant gene groups in multivariate PERMANCOVA. Significant p-Values are marked with asterisk (code: p-Value > 0.001 \*\*\*; >0.01 \*\*; >0.01\*). Bold p-values are in agreement with the multivariate analysis

| ANCOVA                                  |    | aov(x~treatment*challenge+K) |         |         |                |    |
|-----------------------------------------|----|------------------------------|---------|---------|----------------|----|
| <b>Allograph inflammation factor</b>    | Df | SS                           | MS      | F value | Pr(>F)         |    |
| Treatment                               | 1  | 0                            | 0       | 0       | 0.9928         |    |
| Challenge                               | 1  | 0.0006                       | 0.0006  | 0.002   | 0.9634         |    |
| Condition factor                        | 1  | 2.1656                       | 2.1656  | 7.69    | <b>0.0276</b>  | *  |
| Treatment*Challenge                     | 1  | 0.0328                       | 0.0328  | 0.116   | 0.743          |    |
| Residuals                               | 7  | 1.9714                       | 0.2816  |         |                |    |
| <b>Chemokine receptor 9</b>             | Df | SS                           | MS      | F value | Pr(>F)         |    |
| Treatment                               | 1  | 0.835                        | 0.835   | 1.621   | 0.24357        |    |
| Challenge                               | 1  | 6.768                        | 6.768   | 13.141  | <b>0.00845</b> | ** |
| Condition factor                        | 1  | 3.426                        | 3.426   | 6.652   | <b>0.03652</b> | *  |
| <b>Treatment*Challenge</b>              | 1  | 4.554                        | 4.554   | 8.842   | <b>0.0207</b>  | *  |
| Residuals                               | 7  | 3.605                        | 0.515   |         |                |    |
| <b>Coagulation factor II / Thrombin</b> | Df | SS                           | MS      | F value | Pr(>F)         |    |
| Treatment                               | 1  | 2.5447                       | 2.5447  | 11.139  | <b>0.0125</b>  | *  |
| Challenge                               | 1  | 2.0823                       | 2.0823  | 9.115   | <b>0.0194</b>  | *  |
| Condition factor                        | 1  | 0.4833                       | 0.4833  | 2.116   | 0.1891         |    |
| Treatment*Challenge                     | 1  | 1.2581                       | 1.2581  | 5.507   | 0.0513         | .  |
| Residuals                               | 7  | 1.5991                       | 0.2284  |         |                |    |
| <b>Lectine</b>                          | Df | SS                           | MS      | F value | Pr(>F)         |    |
| Treatment                               | 1  | 9.366                        | 9.366   | 14.864  | <b>0.00625</b> | ** |
| Challenge                               | 1  | 13.815                       | 13.815  | 21.925  | <b>0.00225</b> | ** |
| Condition factor                        | 1  | 1.279                        | 1.279   | 2.03    | 0.19722        |    |
| Treatment*Challenge                     | 1  | 4.626                        | 4.626   | 7.342   | <b>0.03022</b> | *  |
| Residuals                               | 7  | 4.411                        | 0.63    |         |                |    |
| <b>Tumor necrose factor</b>             | Df | SS                           | MS      | F value | Pr(>F)         |    |
| Treatment                               | 1  | 0.0318                       | 0.03183 | 0.167   | 0.695          |    |
| Challenge                               | 1  | 0.0042                       | 0.00419 | 0.022   | 0.886          |    |
| Condition factor                        | 1  | 0.203                        | 0.20301 | 1.063   | 0.337          |    |
| Treatment*Challenge                     | 1  | 0.0321                       | 0.03208 | 0.168   | 0.694          |    |
| Residuals                               | 7  | 1.3365                       | 0.19092 |         |                |    |
| <b>Calreticulin 1</b>                   | Df | SS                           | MS      | F value | Pr(>F)         |    |
| Treatment                               | 1  | 0.7877                       | 0.7877  | 4.513   | 0.07127        | .  |
| Challenge                               | 1  | 0.2106                       | 0.2106  | 1.206   | 0.30838        |    |
| Condition factor                        | 1  | 2.8827                       | 2.8827  | 16.513  | 0.00479        | ** |
| Treatment*Challenge                     | 1  | 0.5215                       | 0.5215  | 2.987   | 0.12754        |    |
| Residuals                               | 7  | 1.222                        | 0.1746  |         |                |    |
| <b>Calreticulin 3</b>                   | Df | SS                           | MS      | F value | Pr(>F)         |    |
| Treatment                               | 1  | 0.037                        | 0.037   | 0.153   | 0.70722        |    |
| Challenge                               | 1  | 0.31                         | 0.31    | 1.274   | 0.29614        |    |
| Condition factor                        | 1  | 3.275                        | 3.275   | 13.469  | 0.00796        | ** |
| Treatment*Challenge                     | 1  | 0.014                        | 0.014   | 0.057   | 0.81819        |    |
| Residuals                               | 7  | 1.702                        | 0.243   |         |                |    |
| <b>Catalase</b>                         | Df | SS                           | MS      | F value | Pr(>F)         |    |
| Treatment                               | 1  | 0.7915                       | 0.7915  | 5.346   | 0.054          | .  |
| Challenge                               | 1  | 0.9415                       | 0.9415  | 6.36    | <b>0.0397</b>  | *  |
| Condition factor                        | 1  | 0.0938                       | 0.0938  | 0.633   | 0.4522         |    |

|                              |    |        |        |         |        |    |
|------------------------------|----|--------|--------|---------|--------|----|
| Treatment*Challenge          | 1  | 0.1375 | 0.1375 | 0.929   | 0.3673 |    |
| Residuals                    | 7  | 1.0363 | 0.148  |         |        |    |
| <b>FAM 60A Protein</b>       | Df | SS     | MS     | F value | Pr(>F) |    |
| Treatment                    | 1  | 0.1151 | 0.1151 | 5.893   | 0.0456 | *  |
| Challenge                    | 1  | 0.0881 | 0.0881 | 4.511   | 0.0713 | .  |
| Condition factor             | 1  | 0.4253 | 0.4253 | 21.783  | 0.0023 | ** |
| Treatment*Challenge          | 1  | 0.0068 | 0.0068 | 0.348   | 0.5739 |    |
| Residuals                    | 7  | 0.1367 | 0.0195 |         |        |    |
| <b>Copper zink dismutase</b> | Df | SS     | MS     | F value | Pr(>F) |    |
| Treatment                    | 1  | 0.003  | 0.0027 | 0.005   | 0.944  |    |
| Challenge                    | 1  | 0.101  | 0.1005 | 0.199   | 0.669  |    |
| Condition factor             | 1  | 1.62   | 1.6198 | 3.205   | 0.117  |    |
| Treatment*Challenge          | 1  | 1.64   | 1.6401 | 3.245   | 0.115  |    |
| Residuals                    | 7  | 3.538  | 0.5055 |         |        |    |
| <b>Trypsin 1</b>             | Df | SS     | MS     | F value | Pr(>F) |    |
| Treatment                    | 1  | 0.514  | 0.514  | 0.162   | 0.7    |    |
| Challenge                    | 1  | 0.001  | 0.001  | 0       | 0.989  |    |
| Condition factor             | 1  | 2.395  | 2.395  | 0.753   | 0.414  |    |
| Treatment*Challenge          | 1  | 1.767  | 1.767  | 0.556   | 0.48   |    |
| Residuals                    | 7  | 22.255 | 3.179  |         |        |    |
| <b>Hepcidin</b>              | Df | SS     | MS     | F value | Pr(>F) |    |
| Treatment                    | 1  | 5.337  | 5.337  | 3.739   | 0.0944 | .  |
| Challenge                    | 1  | 2.518  | 2.518  | 1.764   | 0.2258 |    |
| Condition factor             | 1  | 0.902  | 0.902  | 0.632   | 0.4528 |    |
| Treatment*Challenge          | 1  | 3.456  | 3.456  | 2.421   | 0.1637 |    |
| Residuals                    | 7  | 9.991  | 1.427  |         |        |    |
| <b>Latescidin 2</b>          | Df | SS     | MS     | F value | Pr(>F) |    |
| Treatment                    | 1  | 2.153  | 2.153  | 1.466   | 0.265  |    |
| Challenge                    | 1  | 0.489  | 0.489  | 0.333   | 0.582  |    |
| Condition factor             | 1  | 4.19   | 4.19   | 2.852   | 0.135  |    |
| Treatment*Challenge          | 1  | 0.039  | 0.039  | 0.027   | 0.875  |    |
| Residuals                    | 7  | 10.284 | 1.469  |         |        |    |
| <b>Pentraxin</b>             | Df | SS     | MS     | F value | Pr(>F) |    |
| Treatment                    | 1  | 0.134  | 0.1337 | 0.075   | 0.792  |    |
| Challenge                    | 1  | 0.774  | 0.7739 | 0.433   | 0.531  |    |
| Condition factor             | 1  | 0.044  | 0.0443 | 0.025   | 0.879  |    |
| Treatment*Challenge          | 1  | 2.273  | 2.2732 | 1.273   | 0.296  |    |
| Residuals                    | 7  | 12.501 | 1.7859 |         |        |    |
| <b>Serum Amyliod A</b>       | Df | SS     | MS     | F value | Pr(>F) |    |
| Treatment                    | 1  | 0.24   | 0.243  | 0.05    | 0.83   |    |
| Challenge                    | 1  | 9.89   | 9.889  | 2.017   | 0.198  |    |
| Condition factor             | 1  | 0.11   | 0.112  | 0.023   | 0.884  |    |
| Treatment*Challenge          | 1  | 6.56   | 6.556  | 1.338   | 0.285  |    |
| Residuals                    | 7  | 34.31  | 4.902  |         |        |    |
| <i>stress related genes</i>  |    |        |        |         |        |    |
| <b>Heat shock protein 60</b> | Df | SS     | MS     | F value | Pr(>F) |    |
| Treatment                    | 1  | 0.034  | 0.034  | 0.11    | 0.7499 |    |
| Challenge                    | 1  | 3.1606 | 3.1606 | 10.232  | 0.0151 | *  |
| Condition factor             | 1  | 0.1842 | 0.1842 | 0.596   | 0.4652 |    |
| Treatment*Challenge          | 1  | 2.3365 | 2.3365 | 7.564   | 0.0285 | *  |
| Residuals                    | 7  | 2.1622 | 0.3089 |         |        |    |
| <b>Heat shock protein 70</b> | Df | SS     | MS     | F value | Pr(>F) |    |
| Treatment                    | 1  | 0.6447 | 0.6447 | 3.566   | 0.1009 |    |

|                              |    |        |        |         |                |    |
|------------------------------|----|--------|--------|---------|----------------|----|
| Challenge                    | 1  | 1.0332 | 1.0332 | 5.715   | 0.0481         | *  |
| Condition factor             | 1  | 1.349  | 1.349  | 7.462   | 0.0293         | *  |
| Treatment*Challenge          | 1  | 0.4402 | 0.4402 | 2.435   | 0.1626         |    |
| Residuals                    | 7  | 1.2655 | 0.1808 |         |                |    |
| <b>Heat shock protein 90</b> | Df | SS     | MS     | F value | Pr(>F)         |    |
| Treatment                    | 1  | 1.441  | 1.4411 | 0.952   | 0.362          |    |
| Challenge                    | 1  | 0.888  | 0.8877 | 0.587   | 0.469          |    |
| Condition factor             | 1  | 2.171  | 2.1709 | 1.435   | 0.27           |    |
| Treatment*Challenge          | 1  | 0.246  | 0.2457 | 0.162   | 0.699          |    |
| Residuals                    | 7  | 10.591 | 1.513  |         |                |    |
| <b>Cortisol receptor</b>     | Df | SS     | MS     | F value | Pr(>F)         |    |
| Treatment                    | 1  | 11.248 | 11.248 | 14.251  | <b>0.00694</b> | ** |
| Challenge                    | 1  | 2.097  | 2.097  | 2.656   | 0.14716        |    |
| Condition factor             | 1  | 0.016  | 0.016  | 0.021   | 0.88933        |    |
| Treatment*Challenge          | 1  | 0.542  | 0.542  | 0.686   | 0.43479        |    |
| Residuals                    | 7  | 5.525  | 0.789  |         |                |    |
