# Supplementary material for: Parental investment matters for maternal and offspring immune defense in the mouthbrooding cichlid Astatotilapia burtoni
Source: PubMed Central journal article supplement (PMC5738712; doi:10.1186/s12862-017-1109-6), 2017-12-20
Supplement: 12862_2017_1109_MOESM3_ESM.pdf [file 12862_2017_1109_MOESM3_ESM.pdf]

**S3 Table: Tukey HSD test on candidate genes from brooding versus non-brooding females:** Posthoc test following significant results from two-way ANCOVA. P-values marked in **bold** are in agreement with the results from the univariate analysis.

**chemokine receptor**

|                      | control naive (C-) |       |       |               | control virbio (C+) |       |       |         | brooding naive (B-) |       |       |               |
|----------------------|--------------------|-------|-------|---------------|---------------------|-------|-------|---------|---------------------|-------|-------|---------------|
|                      | diff               | lower | upper | p value       | diff                | lower | upper | p value | diff                | lower | upper | p value       |
| control naive (C-)   |                    |       |       |               |                     |       |       |         |                     |       |       |               |
| control virbio (C+)  | 0.31               | -1.63 | 2.24  | 0.9513        |                     |       |       |         |                     |       |       |               |
| brooding naive (B-)  | 0.67               | -1.27 | 2.61  | 0.6779        | 0.97                | -0.97 | 2.91  | 0.4068  |                     |       |       |               |
| brooding vibrio (B+) | 2.03               | 0.09  | 3.97  | <b>0.0411</b> | 1.72                | -3.66 | 0.22  | 0.0807  | 2.70                | 0.76  | 4.64  | <b>0.0102</b> |

**lectine**

|                      | control naive (C-) |       |       |               | control virbio (C+) |       |       |               | brooding naive (B-) |       |       |               |
|----------------------|--------------------|-------|-------|---------------|---------------------|-------|-------|---------------|---------------------|-------|-------|---------------|
|                      | diff               | lower | upper | p value       | diff                | lower | upper | p value       | diff                | lower | upper | p value       |
| control naive (C-)   |                    |       |       |               |                     |       |       |               |                     |       |       |               |
| control virbio (C+)  | 0.94               | -1.21 | 3.09  | 0.5108        |                     |       |       |               |                     |       |       |               |
| brooding naive (B-)  | 0.56               | -2.71 | 1.58  | 0.8223        | 0.38                | -1.77 | 2.52  | 0.9336        |                     |       |       |               |
| brooding vibrio (B+) | 3.91               | 1.77  | 6.06  | <b>0.0022</b> | 2.97                | -5.12 | -0.83 | <b>0.0105</b> | 3.35                | 1.21  | 5.50  | <b>0.0055</b> |
