# Supplementary material for: Parental investment matters for maternal and offspring immune defense in the mouthbrooding cichlid Astatotilapia burtoni
Source: PubMed Central journal article supplement (PMC5738712; doi:10.1186/s12862-017-1109-6), 2017-12-20
Supplement: 12862_2017_1109_MOESM4_ESM.pdf [file 12862_2017_1109_MOESM4_ESM.pdf]

**S4 Table: Tukey HSD test on cellular immune parameter from males, reproducing and non-reproducing females:** Posthoc test following significant results from two-way ANCOVA. P-values marked in bold are in agreement with the results from the univariate analysis.

**Lymphocyte / Monocyte**

|      |              | Male |       |       |               | Reproduction |       |       |               |
|------|--------------|------|-------|-------|---------------|--------------|-------|-------|---------------|
|      |              | diff | lower | upper | p value       | diff         | lower | upper | p value       |
| Male | Reproduction | 1.45 | -2.43 | -0.48 | <b>0.0031</b> |              |       |       |               |
|      | Control      | 0.18 | -1.20 | 0.85  | 0.9012        | 1.63         | -2.57 | -0.69 | <b>0.0007</b> |

**Active / Inactive Cells**

|      |              | Male |       |       |               | Reproduction |         |        |         |
|------|--------------|------|-------|-------|---------------|--------------|---------|--------|---------|
|      |              | diff | lower | upper | p value       | diff         | lower   | upper  | p value |
| Male | Reproduction | 0.54 | 0.03  | 1.05  | <b>0.0373</b> |              |         |        |         |
|      | Control      | 0.09 | -0.62 | 0.45  | 0.9140        | 0.452        | -0.0379 | 0.9419 | 0.0738  |
