# Supplementary material for: Parental investment matters for maternal and offspring immune defense in the mouthbrooding cichlid Astatotilapia burtoni
Source: PubMed Central journal article supplement (PMC5738712; doi:10.1186/s12862-017-1109-6), 2017-12-20
Supplement: 12862_2017_1109_MOESM5_ESM.pdf [file 12862_2017_1109_MOESM5_ESM.pdf]

**S5 Table: ANCOVA on candidate genes from males, reproducing and non reproducing females:**  
 Univariate analysis following significant gene groups in multivariate PERMANCOVA. Significant p-  
 Values are marked with asterisk (code: p-Value > 0.001 \*\*\*, >0.01 \*\*, >0.01\*). Bold p-values are in  
 agreement with the multivariate analysis

| ANCOVA                               |    | aov(x~treatment*challenge+K) |        |         |                |     |
|--------------------------------------|----|------------------------------|--------|---------|----------------|-----|
| <b>Allograph inflammation factor</b> | Df | SS                           | MS     | F value | Pr(>F)         |     |
| Treatment                            | 2  | 1.052                        | 0.526  | 1.163   | 0.335          |     |
| Challenge                            | 1  | 0.181                        | 0.181  | 0.4     | 0.535          |     |
| Condition factor                     | 1  | 0.14                         | 0.1396 | 0.309   | 0.585          |     |
| Treatment*Challenge                  | 1  | 0.214                        | 0.2139 | 0.473   | 0.5            |     |
| Residuals                            | 18 | 8.138                        | 0.4521 |         |                |     |
| <b>Androgen receptor A</b>           | Df | SS                           | MS     | F value | Pr(>F)         |     |
| Treatment                            | 2  | 2.189                        | 1.0947 | 2.947   | 0.0782         |     |
| Challenge                            | 1  | 1.092                        | 1.0921 | 2.94    | 0.1036         |     |
| Condition factor                     | 1  | 0.704                        | 0.7038 | 1.894   | 0.1856         |     |
| Treatment*Challenge                  | 1  | 0.005                        | 0.0046 | 0.012   | 0.9128         |     |
| Residuals                            | 18 | 6.687                        | 0.3715 |         |                |     |
| <b>Androgen receptor B</b>           | Df | SS                           | MS     | F value | Pr(>F)         |     |
| Treatment                            | 2  | 4.161                        | 2.0803 | 8.789   | <b>0.00217</b> | **  |
| Challenge                            | 1  | 0.65                         | 0.6504 | 2.748   | <b>0.11473</b> |     |
| Condition factor                     | 1  | 0                            | 0      | 0       | 0.99323        |     |
| Treatment*Challenge                  | 1  | 0.887                        | 0.8872 | 3.748   | 0.06874        |     |
| Residuals                            | 18 | 4.261                        | 0.2367 |         |                |     |
| <b>Aromatase B</b>                   | Df | SS                           | MS     | F value | Pr(>F)         |     |
| Treatment                            | 2  | 3.946                        | 1.973  | 1.266   | 0.306          |     |
| Challenge                            | 1  | 0.009                        | 0.009  | 0.006   | 0.94           |     |
| Condition factor                     | 1  | 0.981                        | 0.981  | 0.629   | 0.438          |     |
| Treatment*Challenge                  | 1  | 1.189                        | 1.189  | 0.762   | 0.394          |     |
| Residuals                            | 18 | 28.061                       | 1.559  |         |                |     |
| <b>Complement component 1q</b>       | Df | SS                           | MS     | F value | Pr(>F)         |     |
| Treatment                            | 2  | 1.13                         | 0.5648 | 1.359   | 0.282          |     |
| Challenge                            | 1  | 0.086                        | 0.0863 | 0.207   | 0.654          |     |
| Condition factor                     | 1  | 0.812                        | 0.8119 | 1.953   | 0.179          |     |
| Treatment*Challenge                  | 1  | 0.389                        | 0.3892 | 0.936   | 0.346          |     |
| Residuals                            | 18 | 7.484                        | 0.4158 |         |                |     |
| <b>Complement component 9</b>        | Df | SS                           | MS     | F value | Pr(>F)         |     |
| Treatment                            | 2  | 44.38                        | 22.189 | 2.564   | 0.105          |     |
| Challenge                            | 1  | 0.87                         | 0.868  | 0.1     | 0.755          |     |
| Condition factor                     | 1  | 3.31                         | 3.312  | 0.383   | 0.544          |     |
| Treatment*Challenge                  | 1  | 7.82                         | 7.821  | 0.904   | 0.354          |     |
| Residuals                            | 18 | 155.77                       | 8.654  |         |                |     |
| <b>Calreticulin 1</b>                | Df | SS                           | MS     | F value | Pr(>F)         |     |
| Treatment                            | 2  | 0.06                         | 0.0298 | 0.098   | 0.907          |     |
| Challenge                            | 1  | 0.014                        | 0.0138 | 0.045   | 0.834          |     |
| Condition factor                     | 1  | 0.595                        | 0.5949 | 1.952   | 0.179          |     |
| Treatment*Challenge                  | 1  | 0                            | 0.0002 | 0.001   | 0.981          |     |
| Residuals                            | 18 | 5.485                        | 0.3047 |         |                |     |
| <b>Calreticulin 3</b>                | Df | SS                           | MS     | F value | Pr(>F)         |     |
| Treatment                            | 2  | 109.77                       | 54.88  | 10.73   | <b>0.00085</b> | *** |
| Challenge                            | 1  | 0.39                         | 0.39   | 0.077   | 0.78459        |     |
| Condition factor                     | 1  | 1.98                         | 1.98   | 0.387   | 0.54168        |     |
| Treatment*Challenge                  | 1  | 3.87                         | 3.87   | 0.757   | 0.39582        |     |
| Residuals                            | 18 | 92.07                        | 5.11   |         |                |     |

| <b>Catalase</b>                        | Df | SS     | MS     | F value | Pr(>F)         |    |
|----------------------------------------|----|--------|--------|---------|----------------|----|
| Treatment                              | 2  | 0.504  | 0.2521 | 0.54    | 0.592          |    |
| Challenge                              | 1  | 0.024  | 0.0243 | 0.052   | 0.822          |    |
| Condition factor                       | 1  | 0.003  | 0.0035 | 0.007   | 0.932          |    |
| Treatment*Challenge                    | 1  | 0.41   | 0.4101 | 0.879   | 0.361          |    |
| Residuals                              | 18 | 8.402  | 0.4668 |         |                |    |
| <b>Fibronectin beta antigen CD29</b>   | Df | SS     | MS     | F value | Pr(>F)         |    |
| Treatment                              | 2  | 51.51  | 25.753 | 3.769   | <b>0.0429</b>  | *  |
| Challenge                              | 1  | 0.05   | 0.055  | 0.008   | 0.9297         |    |
| Condition factor                       | 1  | 10.28  | 10.276 | 1.504   | 0.2359         |    |
| Treatment*Challenge                    | 1  | 10.71  | 10.712 | 1.568   | 0.2266         |    |
| Residuals                              | 18 | 122.99 | 6.833  |         |                |    |
| <b>Fibronectin beta antigen CD81</b>   | Df | SS     | MS     | F value | Pr(>F)         |    |
| Treatment                              | 2  | 79.57  | 39.79  | 7.776   | <b>0.00368</b> | ** |
| Challenge                              | 1  | 1.56   | 1.56   | 0.305   | 0.58735        |    |
| Condition factor                       | 1  | 0.29   | 0.29   | 0.058   | 0.81304        |    |
| Treatment*Challenge                    | 1  | 12.02  | 12.02  | 2.349   | 0.14277        |    |
| Residuals                              | 18 | 92.1   | 5.12   |         |                |    |
| <b>Chemokine receptor 9</b>            | Df | SS     | MS     | F value | Pr(>F)         |    |
| Treatment                              | 2  | 2.79   | 1.396  | 0.764   | 0.48           |    |
| Challenge                              | 1  | 0.51   | 0.5055 | 0.277   | 0.605          |    |
| Condition factor                       | 1  | 0.1    | 0.0984 | 0.054   | 0.819          |    |
| Treatment*Challenge                    | 1  | 0.04   | 0.0385 | 0.021   | 0.886          |    |
| Residuals                              | 18 | 32.9   | 1.8277 |         |                |    |
| <b>Copper zink dismutase</b>           | Df | SS     | MS     | F value | Pr(>F)         |    |
| Treatment                              | 2  | 0.216  | 0.1081 | 0.311   | 0.737          |    |
| Challenge                              | 1  | 0.024  | 0.0236 | 0.068   | 0.797          |    |
| Condition factor                       | 1  | 0.492  | 0.4918 | 1.416   | 0.25           |    |
| Treatment*Challenge                    | 1  | 0.077  | 0.0768 | 0.221   | 0.644          |    |
| Residuals                              | 18 | 6.253  | 0.3474 |         |                |    |
| <b>Cortisol receptor</b>               | Df | SS     | MS     | F value | Pr(>F)         |    |
| Treatment                              | 2  | 10.31  | 5.156  | 0.779   | 0.474          |    |
| Challenge                              | 1  | 0.12   | 0.116  | 0.017   | 0.896          |    |
| Condition factor                       | 1  | 2.79   | 2.794  | 0.422   | 0.524          |    |
| Treatment*Challenge                    | 1  | 2.22   | 2.223  | 0.336   | 0.569          |    |
| Residuals                              | 18 | 119.2  | 6.622  |         |                |    |
| <b>DNA methyltransferase 1</b>         | Df | SS     | MS     | F value | Pr(>F)         |    |
| Treatment                              | 2  | 1.3573 | 0.6786 | 6.278   | <b>0.00854</b> | ** |
| Challenge                              | 1  | 0.0865 | 0.0865 | 0.8     | 0.38283        |    |
| Condition factor                       | 1  | 0.3223 | 0.3223 | 2.982   | 0.10132        |    |
| Treatment*Challenge                    | 1  | 0.1535 | 0.1535 | 1.42    | 0.24881        |    |
| Residuals                              | 18 | 1.9456 | 0.1081 |         |                |    |
| <b>Elongation Factor 1</b>             | Df | SS     | MS     | F value | Pr(>F)         |    |
| Treatment                              | 2  | 129.95 | 64.98  | 4.231   | <b>0.0312</b>  | *  |
| Challenge                              | 1  | 2.15   | 2.15   | 0.14    | 0.7124         |    |
| Condition factor                       | 1  | 0.56   | 0.56   | 0.037   | 0.8501         |    |
| Treatment*Challenge                    | 1  | 5.28   | 5.28   | 0.344   | 0.5649         |    |
| Residuals                              | 18 | 276.44 | 15.36  |         |                |    |
| <b>Early growth response protein 1</b> | Df | SS     | MS     | F value | Pr(>F)         |    |
| Treatment                              | 2  | 2.483  | 1.2414 | 0.855   | 0.442          |    |
| Challenge                              | 1  | 0.028  | 0.0279 | 0.019   | 0.891          |    |
| Condition factor                       | 1  | 0.486  | 0.4863 | 0.335   | 0.57           |    |
| Treatment*Challenge                    | 1  | 0.126  | 0.1257 | 0.087   | 0.772          |    |

|                                         |                     |    |        |         |        |               |    |
|-----------------------------------------|---------------------|----|--------|---------|--------|---------------|----|
|                                         | Residuals           | 18 | 26.128 | 1.4516  |        |               |    |
| <b>Histone lysine methyltransferase</b> | Df                  | SS | MS     | F value | Pr(>F) |               |    |
|                                         | Treatment           | 2  | 3.14   | 1.569   | 0.445  | 0.6474        |    |
|                                         | Challenge           | 1  | 2.81   | 2.811   | 0.798  | 0.3835        |    |
|                                         | Condition factor    | 1  | 0.22   | 0.222   | 0.063  | 0.8045        |    |
|                                         | Treatment*Challenge | 1  | 11.12  | 11.118  | 3.156  | 0.0926        | .  |
|                                         | Residuals           | 18 | 63.41  | 3.523   |        |               |    |
| <b>Coagulation factor II / Thrombin</b> | Df                  | SS | MS     | F value | Pr(>F) |               |    |
|                                         | Treatment           | 2  | 16.08  | 8.04    | 3.919  | <b>0.0387</b> | *  |
|                                         | Challenge           | 1  | 0.1    | 0.098   | 0.048  | 0.8291        |    |
|                                         | Condition factor    | 1  | 0.27   | 0.272   | 0.132  | 0.7202        |    |
|                                         | Treatment*Challenge | 1  | 0.43   | 0.429   | 0.209  | 0.6531        |    |
|                                         | Residuals           | 18 | 36.93  | 2.052   |        |               |    |
| <b>FAM60 A Protein</b>                  | Df                  | SS | MS     | F value | Pr(>F) |               |    |
|                                         | Treatment           | 2  | 1.317  | 0.6583  | 2.434  | 0.116         |    |
|                                         | Challenge           | 1  | 0.156  | 0.1563  | 0.578  | 0.457         |    |
|                                         | Condition factor    | 1  | 0.21   | 0.2102  | 0.777  | 0.39          |    |
|                                         | Treatment*Challenge | 1  | 0.035  | 0.0351  | 0.13   | 0.723         |    |
|                                         | Residuals           | 18 | 4.869  | 0.2705  |        |               |    |
| <b>Fc fragment of IgL</b>               | Df                  | SS | MS     | F value | Pr(>F) |               |    |
|                                         | Treatment           | 2  | 6.99   | 3.496   | 0.815  | 0.4584        |    |
|                                         | Challenge           | 1  | 1.56   | 1.564   | 0.365  | 0.5535        |    |
|                                         | Condition factor    | 1  | 17.34  | 17.34   | 4.042  | 0.0596        | .  |
|                                         | Treatment*Challenge | 1  | 18.09  | 18.086  | 4.215  | 0.0549        | .  |
|                                         | Residuals           | 18 | 77.23  | 4.29    |        |               |    |
| <b>Growth hormone releasing hormone</b> | Df                  | SS | MS     | F value | Pr(>F) |               |    |
|                                         | Treatment           | 2  | 34.09  | 17.047  | 2.36   | 0.123         |    |
|                                         | Challenge           | 1  | 0.76   | 0.762   | 0.105  | 0.749         |    |
|                                         | Condition factor    | 1  | 0.07   | 0.074   | 0.01   | 0.92          |    |
|                                         | Treatment*Challenge | 1  | 19.11  | 19.108  | 2.645  | 0.121         |    |
|                                         | Residuals           | 18 | 130.04 | 7.225   |        |               |    |
| <b>Trypsin I</b>                        | Df                  | SS | MS     | F value | Pr(>F) |               |    |
|                                         | Treatment           | 2  | 58.49  | 29.246  | 5.323  | <b>0.0153</b> | *  |
|                                         | Challenge           | 1  | 0.35   | 0.347   | 0.063  | 0.8044        |    |
|                                         | Condition factor    | 1  | 4.1    | 4.1     | 0.746  | 0.399         |    |
|                                         | Treatment*Challenge | 1  | 7.41   | 7.411   | 1.349  | 0.2606        |    |
|                                         | Residuals           | 18 | 98.89  | 5.494   |        |               |    |
| <b>Histone deacetylase</b>              | Df                  | SS | MS     | F value | Pr(>F) |               |    |
|                                         | Treatment           | 2  | 2.83   | 1.414   | 0.312  | 0.736         |    |
|                                         | Challenge           | 1  | 0.16   | 0.157   | 0.035  | 0.854         |    |
|                                         | Condition factor    | 1  | 3.06   | 3.056   | 0.675  | 0.422         |    |
|                                         | Treatment*Challenge | 1  | 0.49   | 0.494   | 0.109  | 0.745         |    |
|                                         | Residuals           | 18 | 81.54  | 4.53    |        |               |    |
| <b>Histone demethylase</b>              | Df                  | SS | MS     | F value | Pr(>F) |               |    |
|                                         | Treatment           | 2  | 1.371  | 0.6855  | 2.985  | 0.076         | .  |
|                                         | Challenge           | 1  | 0.199  | 0.199   | 0.866  | 0.364         |    |
|                                         | Condition factor    | 1  | 0.6    | 0.6     | 2.612  | 0.123         |    |
|                                         | Treatment*Challenge | 1  | 0.468  | 0.4678  | 2.036  | 0.171         |    |
|                                         | Residuals           | 18 | 4.134  | 0.2297  |        |               |    |
| <b>Hepcidin</b>                         | Df                  | SS | MS     | F value | Pr(>F) |               |    |
|                                         | Treatment           | 2  | 80.28  | 40.14   | 6.478  | <b>0.0076</b> | ** |
|                                         | Challenge           | 1  | 0.2    | 0.2     | 0.032  | 0.8596        |    |
|                                         | Condition factor    | 1  | 11.11  | 11.11   | 1.793  | 0.1973        |    |

|                                                 |    |        |        |         |                |     |
|-------------------------------------------------|----|--------|--------|---------|----------------|-----|
| Treatment*Challenge                             | 1  | 8      | 8      | 1.291   | 0.2708         |     |
| Residuals                                       | 18 | 111.54 | 6.2    |         |                |     |
| <b>Major histocompatibility complex II beta</b> | Df | SS     | MS     | F value | Pr(>F)         |     |
| Treatment                                       | 2  | 264.3  | 132.15 | 10.73   | <b>0.00085</b> | *** |
| Challenge                                       | 1  | 5.6    | 5.6    | 0.455   | 0.50852        |     |
| Condition factor                                | 1  | 2.56   | 2.56   | 0.208   | 0.65394        |     |
| Treatment*Challenge                             | 1  | 14.75  | 14.75  | 1.197   | 0.28828        |     |
| Residuals                                       | 18 | 221.69 | 12.32  |         |                |     |
| <b>Heat shock protein 60</b>                    | Df | SS     | MS     | F value | Pr(>F)         |     |
| Treatment                                       | 2  | 1.096  | 0.5482 | 1.551   | 0.239          |     |
| Challenge                                       | 1  | 0.04   | 0.0402 | 0.114   | 0.74           |     |
| Condition factor                                | 1  | 0.032  | 0.0317 | 0.09    | 0.768          |     |
| Treatment*Challenge                             | 1  | 0.634  | 0.6339 | 1.793   | 0.197          |     |
| Residuals                                       | 18 | 6.362  | 0.3535 |         |                |     |
| <b>Heat shock protein 70</b>                    | Df | SS     | MS     | F value | Pr(>F)         |     |
| Treatment                                       | 2  | 40.01  | 20.004 | 5.157   | <b>0.017</b>   | *   |
| Challenge                                       | 1  | 1.71   | 1.709  | 0.441   | 0.515          |     |
| Condition factor                                | 1  | 4.7    | 4.696  | 1.211   | 0.286          |     |
| Treatment*Challenge                             | 1  | 2.37   | 2.375  | 0.612   | 0.444          |     |
| Residuals                                       | 18 | 69.82  | 3.879  |         |                |     |
| <b>Heat shock protein 90</b>                    | Df | SS     | MS     | F value | Pr(>F)         |     |
| Treatment                                       | 2  | 1.76   | 0.879  | 0.15    | 0.862          |     |
| Challenge                                       | 1  | 0.05   | 0.048  | 0.008   | 0.929          |     |
| Condition factor                                | 1  | 11.7   | 11.702 | 1.992   | 0.175          |     |
| Treatment*Challenge                             | 1  | 3.76   | 3.756  | 0.639   | 0.434          |     |
| Residuals                                       | 18 | 105.77 | 5.876  |         |                |     |
| <b>Immunoglobulin L light chain</b>             | Df | SS     | MS     | F value | Pr(>F)         |     |
| Treatment                                       | 2  | 0.118  | 0.0591 | 0.039   | 0.962          |     |
| Challenge                                       | 1  | 0.016  | 0.0158 | 0.01    | 0.92           |     |
| Condition factor                                | 1  | 0.092  | 0.0918 | 0.061   | 0.808          |     |
| Treatment*Challenge                             | 1  | 1.026  | 1.0258 | 0.682   | 0.42           |     |
| Residuals                                       | 18 | 27.086 | 1.5048 |         |                |     |
| <b>Interleukin 10</b>                           | Df | SS     | MS     | F value | Pr(>F)         |     |
| Treatment                                       | 2  | 2.575  | 1.2877 | 3.987   | <b>0.0369</b>  | *   |
| Challenge                                       | 1  | 0.302  | 0.3016 | 0.934   | 0.3467         |     |
| Condition factor                                | 1  | 0.21   | 0.2101 | 0.65    | 0.4305         |     |
| Treatment*Challenge                             | 1  | 0.03   | 0.0302 | 0.094   | 0.7632         |     |
| Residuals                                       | 18 | 5.813  | 0.323  |         |                |     |
| <b>Integrin alpha 2</b>                         | Df | SS     | MS     | F value | Pr(>F)         |     |
| Treatment                                       | 2  | 0.989  | 0.4947 | 1.74    | 0.204          |     |
| Challenge                                       | 1  | 0.013  | 0.0133 | 0.047   | 0.831          |     |
| Condition factor                                | 1  | 0.107  | 0.1072 | 0.377   | 0.547          |     |
| Treatment*Challenge                             | 1  | 0.002  | 0.0018 | 0.006   | 0.937          |     |
| Residuals                                       | 18 | 5.118  | 0.2843 |         |                |     |
| <b>Latescidin 2</b>                             | Df | SS     | MS     | F value | Pr(>F)         |     |
| Treatment                                       | 2  | 89.48  | 44.74  | 6.688   | <b>0.00673</b> | **  |
| Challenge                                       | 1  | 3.12   | 3.12   | 0.467   | 0.50325        |     |
| Condition factor                                | 1  | 12.16  | 12.16  | 1.818   | 0.19424        |     |
| Treatment*Challenge                             | 1  | 11.51  | 11.51  | 1.72    | 0.20615        |     |
| Residuals                                       | 18 | 120.4  | 6.69   |         |                |     |
| <b>Lymphocyte cytosolic factor I</b>            | Df | SS     | MS     | F value | Pr(>F)         |     |
| Treatment                                       | 2  | 0.86   | 0.4298 | 1.088   | 0.358          |     |
| Challenge                                       | 1  | 0.052  | 0.0515 | 0.13    | 0.722          |     |

|                                                       |    |        |        |         |                |     |
|-------------------------------------------------------|----|--------|--------|---------|----------------|-----|
| Condition factor                                      | 1  | 0.051  | 0.0512 | 0.13    | 0.723          |     |
| Treatment*Challenge                                   | 1  | 0.03   | 0.0296 | 0.075   | 0.787          |     |
| Residuals                                             | 18 | 7.113  | 0.3952 |         |                |     |
| <b>Lectine</b>                                        | Df | SS     | MS     | F value | Pr(>F)         |     |
| Treatment                                             | 2  | 12.51  | 6.253  | 0.617   | 0.551          |     |
| Challenge                                             | 1  | 0.61   | 0.609  | 0.06    | 0.809          |     |
| Condition factor                                      | 1  | 1.23   | 1.23   | 0.121   | 0.732          |     |
| Treatment*Challenge                                   | 1  | 0.15   | 0.154  | 0.015   | 0.903          |     |
| Residuals                                             | 18 | 182.52 | 10.14  |         |                |     |
| <b>Lysine specific demethylase</b>                    | Df | SS     | MS     | F value | Pr(>F)         |     |
| Treatment                                             | 2  | 2.568  | 1.284  | 2.226   | 0.137          |     |
| Challenge                                             | 1  | 0.043  | 0.0429 | 0.074   | 0.788          |     |
| Condition factor                                      | 1  | 0.181  | 0.1813 | 0.314   | 0.582          |     |
| Treatment*Challenge                                   | 1  | 0.163  | 0.163  | 0.283   | 0.601          |     |
| Residuals                                             | 18 | 10.381 | 0.5767 |         |                |     |
| <b>Major histocompatibility complex I antigen F10</b> | Df | SS     | MS     | F value | Pr(>F)         |     |
| Treatment                                             | 2  | 8.39   | 4.2    | 0.258   | 0.7752         |     |
| Challenge                                             | 1  | 10.59  | 10.59  | 0.651   | 0.4301         |     |
| Condition factor                                      | 1  | 48.35  | 48.35  | 2.976   | 0.1016         |     |
| Treatment*Challenge                                   | 1  | 75.57  | 75.57  | 4.651   | 0.0448         | *   |
| Residuals                                             | 18 | 292.48 | 16.25  |         |                |     |
| <b>Myogenic regulatory factors</b>                    | Df | SS     | MS     | F value | Pr(>F)         |     |
| Treatment                                             | 2  | 61.99  | 30.993 | 12.838  | <b>0.00034</b> | *** |
| Challenge                                             | 1  | 0.07   | 0.068  | 0.028   | 0.86889        |     |
| Condition factor                                      | 1  | 0.36   | 0.357  | 0.148   | 0.70489        |     |
| Treatment*Challenge                                   | 1  | 3.96   | 3.958  | 1.639   | 0.21664        |     |
| Residuals                                             | 18 | 43.45  | 2.414  |         |                |     |
| <b>Opsin 1</b>                                        | Df | SS     | MS     | F value | Pr(>F)         |     |
| Treatment                                             | 2  | 85.64  | 42.82  | 8.446   | <b>0.00259</b> | **  |
| Challenge                                             | 1  | 1.52   | 1.52   | 0.299   | 0.59097        |     |
| Condition factor                                      | 1  | 0.05   | 0.05   | 0.009   | 0.92425        |     |
| Treatment*Challenge                                   | 1  | 1.97   | 1.97   | 0.389   | 0.5407         |     |
| Residuals                                             | 18 | 91.26  | 5.07   |         |                |     |
| <b>Proprotein convertase subtilisin</b>               | Df | SS     | MS     | F value | Pr(>F)         |     |
| Treatment                                             | 2  | 1.383  | 0.6917 | 2.648   | 0.0981         | .   |
| Challenge                                             | 1  | 0.158  | 0.1583 | 0.606   | 0.4463         |     |
| Condition factor                                      | 1  | 0.001  | 0.0007 | 0.003   | 0.9584         |     |
| Treatment*Challenge                                   | 1  | 0.041  | 0.0413 | 0.158   | 0.6955         |     |
| Residuals                                             | 18 | 4.701  | 0.2612 |         |                |     |
| <b>Pentraxin 4</b>                                    | Df | SS     | MS     | F value | Pr(>F)         |     |
| Treatment                                             | 2  | 10.88  | 5.442  | 0.955   | 0.4035         |     |
| Challenge                                             | 1  | 0.07   | 0.073  | 0.013   | 0.911          |     |
| Condition factor                                      | 1  | 0.81   | 0.813  | 0.143   | 0.7101         |     |
| Treatment*Challenge                                   | 1  | 20.31  | 20.315 | 3.565   | 0.0752         | .   |
| Residuals                                             | 18 | 102.57 | 5.699  |         |                |     |
| <b>Ribosomal protein A3</b>                           | Df | SS     | MS     | F value | Pr(>F)         |     |
| Treatment                                             | 2  | 2.201  | 1.1005 | 3.343   | 0.0583         | .   |
| Challenge                                             | 1  | 0.002  | 0.0016 | 0.005   | 0.9449         |     |
| Condition factor                                      | 1  | 0.216  | 0.2161 | 0.656   | 0.4284         |     |
| Treatment*Challenge                                   | 1  | 0.105  | 0.1047 | 0.318   | 0.5797         |     |
| Residuals                                             | 18 | 5.926  | 0.3292 |         |                |     |
| <b>Serum amyloid A</b>                                | Df | SS     | MS     | F value | Pr(>F)         |     |
| Treatment                                             | 2  | 52.6   | 26.301 | 3.87    | <b>0.04</b>    | *   |

|                                  |    |        |        |         |        |   |
|----------------------------------|----|--------|--------|---------|--------|---|
| Challenge                        | 1  | 4.43   | 4.428  | 0.652   | 0.43   |   |
| Condition factor                 | 1  | 2.97   | 2.969  | 0.437   | 0.517  |   |
| Treatment*Challenge              | 1  | 1.7    | 1.698  | 0.25    | 0.623  |   |
| Residuals                        | 18 | 122.34 | 6.797  |         |        |   |
| <b>Tumor necrose factor beta</b> | Df | SS     | MS     | F value | Pr(>F) |   |
| Treatment                        | 2  | 2.589  | 1.2944 | 2.867   | 0.083  | . |
| Challenge                        | 1  | 0.247  | 0.2471 | 0.547   | 0.469  |   |
| Condition factor                 | 1  | 0.294  | 0.2937 | 0.651   | 0.43   |   |
| Treatment*Challenge              | 1  | 0.109  | 0.1088 | 0.241   | 0.629  |   |
| Residuals                        | 18 | 8.126  | 0.4514 |         |        |   |
|                                  |    |        |        |         |        |   |
