# Supplementary material for: Parental investment matters for maternal and offspring immune defense in the mouthbrooding cichlid Astatotilapia burtoni
Source: PubMed Central journal article supplement (PMC5738712; doi:10.1186/s12862-017-1109-6), 2017-12-20
Supplement: 12862_2017_1109_MOESM6_ESM.pdf [file 12862_2017_1109_MOESM6_ESM.pdf]

**S6 Table: Tukey HSD test on candidate genes from males, reproducing and non-reproducing females:** Posthoc test following significant results from two-way ANCOVA. P-values marked in bold are in agreement with the results from the univariate analysis.

**MHC II b**

|              |  | Male |        |       |               | Reproduction |       |       |         |
|--------------|--|------|--------|-------|---------------|--------------|-------|-------|---------|
|              |  | diff | lower  | upper | p value       | diff         | lower | upper | p value |
| Male         |  |      |        |       |               |              |       |       |         |
| Reproduction |  | 8.01 | -12.35 | -3.67 | <b>0.0004</b> |              |       |       |         |
| Control      |  | 4.80 | 0.09   | 9.51  | <b>0.0452</b> | 3.21         | -7.55 | 1.13  | 0.1721  |

**II10**

|              |  | Male |       |       |               | Reproduction |       |       |         |
|--------------|--|------|-------|-------|---------------|--------------|-------|-------|---------|
|              |  | diff | lower | upper | p value       | diff         | lower | upper | p value |
| Male         |  |      |       |       |               |              |       |       |         |
| Reproduction |  | 1.45 | -2.43 | -0.48 | <b>0.0031</b> |              |       |       |         |
| Control      |  | 0.78 | -1.48 | -0.07 | <b>0.0288</b> | 0.18         | -0.88 | 0.52  | 0.7920  |

**CD8**

|              |  | Male |       |       |               | Reproduction |       |       |               |
|--------------|--|------|-------|-------|---------------|--------------|-------|-------|---------------|
|              |  | diff | lower | upper | p value       | diff         | lower | upper | p value       |
| Male         |  |      |       |       |               |              |       |       |               |
| Reproduction |  | 0.78 | 0.04  | 1.53  | <b>0.0373</b> |              |       |       |               |
| Control      |  | 0.08 | -0.73 | 0.88  | 0.9666        | 0.86         | 0.12  | 1.61  | <b>0.0212</b> |

**calreticulin 3**

|              |  | Male |       |       |               | Reproduction |       |       |         |
|--------------|--|------|-------|-------|---------------|--------------|-------|-------|---------|
|              |  | diff | lower | upper | p value       | diff         | lower | upper | p value |
| Male         |  |      |       |       |               |              |       |       |         |
| Reproduction |  | 5.16 | -7.97 | -2.35 | <b>0.0005</b> |              |       |       |         |
| Control      |  | 3.11 | 0.07  | 6.16  | <b>0.0446</b> | 2.05         | -4.86 | 0.76  | 0.1800  |

**Serum Amyloid**

|              |  | Male |       |       |               | Reproduction |       |       |         |
|--------------|--|------|-------|-------|---------------|--------------|-------|-------|---------|
|              |  | diff | lower | upper | p value       | diff         | lower | upper | p value |
| Male         |  |      |       |       |               |              |       |       |         |
| Reproduction |  | 3.25 | 0.05  | 6.45  | <b>0.0458</b> |              |       |       |         |
| Control      |  | 0.57 | -4.03 | 2.90  | 0.9104        | 2.69         | -0.51 | 5.89  | 0.1093  |

**thrombin receptor**

|              |  | Male |       |       |               | Reproduction |       |       |         |
|--------------|--|------|-------|-------|---------------|--------------|-------|-------|---------|
|              |  | diff | lower | upper | p value       | diff         | lower | upper | p value |
| Male         |  |      |       |       |               |              |       |       |         |
| Reproduction |  | 1.97 | -3.72 | -0.22 | <b>0.0256</b> |              |       |       |         |
| Control      |  | 1.03 | -0.86 | 2.93  | 0.3674        | 0.94         | -2.68 | 0.81  | 0.3804  |

**trypsin**

|              |  | Male |       |       |               | Reproduction |       |       |               |
|--------------|--|------|-------|-------|---------------|--------------|-------|-------|---------------|
|              |  | diff | lower | upper | p value       | diff         | lower | upper | p value       |
| Male         |  |      |       |       |               |              |       |       |               |
| Reproduction |  | 3.00 | 0.12  | 5.87  | <b>0.0405</b> |              |       |       |               |
| Control      |  | 0.32 | -2.80 | 3.44  | 0.9628        | 3.32         | 0.44  | 6.20  | <b>0.0223</b> |

**latescidin 2**

|              |  | Male |       |       |               | Reproduction |       |       |               |
|--------------|--|------|-------|-------|---------------|--------------|-------|-------|---------------|
|              |  | diff | lower | upper | p value       | diff         | lower | upper | p value       |
| Male         |  |      |       |       |               |              |       |       |               |
| Reproduction |  | 3.86 | 0.63  | 7.08  | <b>0.0179</b> |              |       |       |               |
| Control      |  | 0.12 | -3.38 | 3.62  | 0.9958        | 3.98         | 0.75  | 7.20  | <b>0.0146</b> |

**hepcidine**

|              |  | Male |       |       |               | Reproduction |       |       |               |
|--------------|--|------|-------|-------|---------------|--------------|-------|-------|---------------|
|              |  | diff | lower | upper | p value       | diff         | lower | upper | p value       |
| Male         |  |      |       |       |               |              |       |       |               |
| Reproduction |  | 3.93 | 0.82  | 7.04  | <b>0.0123</b> |              |       |       |               |
| Control      |  | 0.48 | -3.86 | 2.90  | 0.9312        | 3.45         | 0.34  | 6.57  | <b>0.0284</b> |

**HSP70**

|              |  | Male |       |       |               | Reproduction |       |       |         |
|--------------|--|------|-------|-------|---------------|--------------|-------|-------|---------|
|              |  | diff | lower | upper | p value       | diff         | lower | upper | p value |
| Male         |  |      |       |       |               |              |       |       |         |
| Reproduction |  | 0.81 | 0.17  | 1.44  | <b>0.0116</b> |              |       |       |         |
| Control      |  | 0.71 | -1.40 | -0.02 | <b>0.0418</b> | 0.10         | -0.54 | 0.73  | 0.9222  |

**elongation factor**

|              |  | Male |        |       |               | Reproduction |       |       |         |
|--------------|--|------|--------|-------|---------------|--------------|-------|-------|---------|
|              |  | diff | lower  | upper | p value       | diff         | lower | upper | p value |
| Male         |  |      |        |       |               |              |       |       |         |
| Reproduction |  | 5.49 | -10.28 | -0.70 | <b>0.0231</b> |              |       |       |         |
| Control      |  | 2.16 | -3.03  | 7.36  | 0.5514        | 3.33         | -8.12 | 1.46  | 0.2074  |

**opsin**

|              |  | Male |       |       |               | Reproduction |       |       |               |
|--------------|--|------|-------|-------|---------------|--------------|-------|-------|---------------|
|              |  | diff | lower | upper | p value       | diff         | lower | upper | p value       |
| Male         |  |      |       |       |               |              |       |       |               |
| Reproduction |  | 3.64 | 0.89  | 6.38  | <b>0.0087</b> |              |       |       |               |
| Control      |  | 0.37 | -2.61 | 3.35  | 0.9470        | 4.01         | 1.26  | 6.75  | <b>0.0041</b> |

**myogenic regulation**

|              |  | Male |       |       |               | Reproduction |       |       |               |
|--------------|--|------|-------|-------|---------------|--------------|-------|-------|---------------|
|              |  | diff | lower | upper | p value       | diff         | lower | upper | p value       |
| Male         |  |      |       |       |               |              |       |       |               |
| Reproduction |  | 3.41 | 1.51  | 5.30  | <b>0.0006</b> |              |       |       |               |
| Control      |  | 0.31 | -2.37 | 1.74  | 0.9202        | 3.09         | 1.20  | 4.99  | <b>0.0015</b> |

**methyltransferase**

|              |  | Male |       |       |               | Reproduction |       |       |         |
|--------------|--|------|-------|-------|---------------|--------------|-------|-------|---------|
|              |  | diff | lower | upper | p value       | diff         | lower | upper | p value |
| Male         |  |      |       |       |               |              |       |       |         |
| Reproduction |  | 0.57 | 0.13  | 1.02  | <b>0.0101</b> |              |       |       |         |
| Control      |  | 0.34 | -0.82 | 0.14  | 0.1917        | 0.34         | -0.82 | 0.14  | 0.1917  |

**androgen receptor B**

|              |  | Male |       |       |               | Reproduction |       |       |               |
|--------------|--|------|-------|-------|---------------|--------------|-------|-------|---------------|
|              |  | diff | lower | upper | p value       | diff         | lower | upper | p value       |
| Male         |  |      |       |       |               |              |       |       |               |
| Reproduction |  | 0.83 | 0.23  | 1.43  | <b>0.0061</b> |              |       |       |               |
| Control      |  | 0.03 | -0.62 | 0.68  | 0.9917        | 0.86         | 0.26  | 1.46  | <b>0.0046</b> |
