# Supplementary material for: Parental investment matters for maternal and offspring immune defense in the mouthbrooding cichlid Astatotilapia burtoni
Source: PubMed Central journal article supplement (PMC5738712; doi:10.1186/s12862-017-1109-6), 2017-12-20
Supplement: 12862_2017_1109_MOESM7_ESM.pdf [file 12862_2017_1109_MOESM7_ESM.pdf]

**S7 Table: nested ANOVA on candidate genes from mouthbred juveniles:** Univariate analysis following significant gene groups in multivariate nested MANOVA. Significant p-Values are marked with asterisk (code: p-Value > 0.001 \*\*\*; >0.01 \*\*; >0.01\*). **Bold p-values** are in agreement with the multivariate analysis

| nested ANOVA                            |    | aov(x~jtreatment*ftreatment+ftreatment%in%family) |          |         |                 |    |
|-----------------------------------------|----|---------------------------------------------------|----------|---------|-----------------|----|
| Allograph inflammation factor           | Df | SS                                                | MS       | F value | Pr(>F)          |    |
| juvenile challenge                      | 2  | 2.64E-07                                          | 1.32E-07 | 0.9166  | 0.4059          |    |
| maternal treatment                      | 1  | 8.83E-08                                          | 8.83E-08 | 0.6137  | 0.4368          |    |
| juvenile challenge * maternal treatment | 2  | 3.65E-07                                          | 1.83E-07 | 1.2681  | 0.2895          |    |
| maternal treatment in famliy            | 2  | 3.08E-07                                          | 1.54E-07 | 1.0685  | 0.3505          |    |
| Residuals                               | 55 | 7.92E-06                                          | 1.44E-07 |         |                 |    |
| Androgen receptor A                     | Df | SS                                                | MS       | F value | Pr(>F)          |    |
| juvenile challenge                      | 2  | 3.59                                              | 1.7972   | 0.3044  | 0.73883         |    |
| maternal treatment                      | 1  | 18.47                                             | 18.4743  | 3.1286  | 0.08248         | .  |
| juvenile challenge * maternal treatment | 2  | 23.19                                             | 11.5933  | 1.9633  | 0.15011         |    |
| maternal treatment in famliy            | 2  | 23.13                                             | 11.5647  | 1.9584  | 0.15079         |    |
| Residuals                               | 55 | 324.78                                            | 5.905    |         |                 |    |
| Androgen receptor B                     | Df | SS                                                | MS       | F value | Pr(>F)          |    |
| juvenile challenge                      | 2  | 3064                                              | 1532     | 0.2629  | 0.769779        |    |
| maternal treatment                      | 1  | 33837                                             | 33837    | 5.8062  | <b>0.019344</b> | *  |
| juvenile challenge * maternal treatment | 2  | 8162                                              | 4081     | 0.7003  | 0.500806        |    |
| maternal treatment in famliy            | 2  | 62023                                             | 31011    | 5.3214  | 0.007715        | ** |
| Residuals                               | 55 | 320524                                            | 5828     |         |                 |    |
| Aromatase B                             | Df | SS                                                | MS       | F value | Pr(>F)          |    |
| juvenile challenge                      | 2  | 4.75E-07                                          | 2.38E-07 | 3.6486  | <b>0.03252</b>  | *  |
| maternal treatment                      | 1  | 3.89E-07                                          | 3.89E-07 | 5.9754  | <b>0.01774</b>  | *  |
| juvenile challenge * maternal treatment | 2  | 5.03E-07                                          | 2.51E-07 | 3.8595  | 0.02701         | *  |
| maternal treatment in famliy            | 2  | 2.86E-07                                          | 1.43E-07 | 2.1977  | 0.12072         |    |
| Residuals                               | 55 | 3.58E-06                                          | 6.51E-08 |         |                 |    |
| Complement component 1q                 | Df | SS                                                | MS       | F value | Pr(>F)          |    |
| juvenile challenge                      | 2  | 1.25E-06                                          | 6.25E-07 | 3.5572  | <b>0.035253</b> | *  |
| maternal treatment                      | 1  | 3.59E-07                                          | 3.59E-07 | 2.0396  | 0.158906        |    |
| juvenile challenge * maternal treatment | 2  | 2.40E-06                                          | 1.20E-06 | 6.8183  | <b>0.002263</b> | ** |
| maternal treatment in famliy            | 2  | 2.48E-07                                          | 1.24E-07 | 0.7052  | 0.49842         |    |
| Residuals                               | 55 | 9.67E-06                                          | 1.76E-07 |         |                 |    |
| Complement component 9                  | Df | SS                                                | MS       | F value | Pr(>F)          |    |
| juvenile challenge                      | 2  | 1.043                                             | 0.52149  | 0.9829  | 0.38072         |    |
| maternal treatment                      | 1  | 0.7514                                            | 0.75138  | 1.4161  | 0.23915         |    |
| juvenile challenge * maternal treatment | 2  | 1.3599                                            | 0.67994  | 1.2815  | 0.28578         |    |
| maternal treatment in famliy            | 2  | 3.8644                                            | 1.93221  | 3.6417  | 0.03272         | *  |
| Residuals                               | 55 | 29.1822                                           | 0.53059  |         |                 |    |
| Calreticulin 1                          | Df | SS                                                | MS       | F value | Pr(>F)          |    |
| juvenile challenge                      | 2  | 8.06E-07                                          | 4.03E-07 | 3.4109  | <b>0.04014</b>  | *  |
| maternal treatment                      | 1  | 7.23E-08                                          | 7.23E-08 | 0.6117  | 0.43751         |    |
| juvenile challenge * maternal treatment | 2  | 9.71E-07                                          | 4.85E-07 | 4.1078  | 0.02174         | *  |

|                                         |    |          |          |         |                 |    |
|-----------------------------------------|----|----------|----------|---------|-----------------|----|
| maternal treatment in famliy            | 2  | 5.76E-07 | 2.88E-07 | 2.4391  | 0.09662         | .  |
| Residuals                               | 55 | 6.50E-06 | 1.18E-07 |         |                 |    |
| <b>Calreticulin 3</b>                   | Df | SS       | MS       | F value | Pr(>F)          |    |
| juvenile challenge                      | 2  | 1.89E-06 | 9.45E-07 | 3.0182  | 0.057051        | .  |
| maternal treatment                      | 1  | 1.07E-07 | 1.07E-07 | 0.3416  | 0.561296        |    |
| juvenile challenge * maternal treatment | 2  | 4.13E-06 | 2.06E-06 | 6.5933  | 0.002712        | ** |
| maternal treatment in famliy            | 2  | 1.15E-06 | 5.75E-07 | 1.8374  | 0.168872        |    |
| Residuals                               | 55 | 1.72E-05 | 3.13E-07 |         |                 |    |
| <b>Catalase</b>                         | Df | SS       | MS       | F value | Pr(>F)          |    |
| juvenile challenge                      | 2  | 1.57E-07 | 7.84E-08 | 1.0475  | 0.357713        |    |
| maternal treatment                      | 1  | 1.94E-07 | 1.94E-07 | 2.5963  | 0.112839        |    |
| juvenile challenge * maternal treatment | 2  | 7.62E-07 | 3.81E-07 | 5.0893  | 0.009377        | ** |
| maternal treatment in famliy            | 2  | 3.45E-07 | 1.72E-07 | 2.3019  | 0.109634        |    |
| Residuals                               | 55 | 4.12E-06 | 7.49E-08 |         |                 |    |
| <b>Fibronectin beta antigen CD29</b>    | Df | SS       | MS       | F value | Pr(>F)          |    |
| juvenile challenge                      | 2  | 39658    | 19829    | 0.8329  | 0.4402          |    |
| maternal treatment                      | 1  | 6893     | 6893     | 0.2895  | 0.5927          |    |
| juvenile challenge * maternal treatment | 2  | 10940    | 5470     | 0.2298  | 0.7955          |    |
| maternal treatment in famliy            | 2  | 73463    | 36732    | 1.5429  | 0.2229          |    |
| Residuals                               | 55 | 1309356  | 23806    |         |                 |    |
| <b>Fibronectin beta antigen CD81</b>    | Df | SS       | MS       | F value | Pr(>F)          |    |
| juvenile challenge                      | 2  | 7.99E-07 | 3.99E-07 | 2.9752  | 0.059308        | .  |
| maternal treatment                      | 1  | 1.58E-07 | 1.58E-07 | 1.1761  | 0.282874        |    |
| juvenile challenge * maternal treatment | 2  | 1.75E-06 | 8.74E-07 | 6.5106  | 0.002899        | ** |
| maternal treatment in famliy            | 2  | 3.87E-08 | 1.94E-08 | 0.1442  | 0.866           |    |
| Residuals                               | 55 | 7.38E-06 | 1.34E-07 |         |                 |    |
| <b>Chemokine receptor 9</b>             | Df | SS       | MS       | F value | Pr(>F)          |    |
| juvenile challenge                      | 2  | 1.98E-07 | 9.88E-08 | 1.3158  | 0.276583        |    |
| maternal treatment                      | 1  | 7.96E-07 | 7.96E-07 | 10.6012 | <b>0.001937</b> | ** |
| juvenile challenge * maternal treatment | 2  | 6.43E-07 | 3.21E-07 | 4.281   | 0.018708        | *  |
| maternal treatment in famliy            | 2  | 1.90E-07 | 9.47E-08 | 1.2618  | 0.291203        |    |
| Residuals                               | 55 | 4.13E-06 | 7.51E-08 |         |                 |    |
| <b>Copper zink dismutase</b>            |    |          |          |         |                 |    |
| juvenile challenge                      | 2  | 1.09E-06 | 5.45E-07 | 1.0776  | 0.3475          |    |
| maternal treatment                      | 1  | 7.20E-07 | 7.20E-07 | 1.4226  | 0.23809         |    |
| juvenile challenge * maternal treatment | 2  | 3.73E-06 | 1.87E-06 | 3.6897  | 0.03136         | *  |
| maternal treatment in famliy            | 2  | 3.86E-06 | 1.93E-06 | 3.8108  | 0.02819         | *  |
| Residuals                               | 55 | 2.78E-05 | 5.06E-07 |         |                 |    |
| <b>Cortisol receptor</b>                | Df | SS       | MS       | F value | Pr(>F)          |    |
| juvenile challenge                      | 2  | 843      | 421.7    | 0.5703  | 0.568655        |    |
| maternal treatment                      | 1  | 142      | 141.7    | 0.1916  | 0.663266        |    |
| juvenile challenge * maternal treatment | 2  | 7443     | 3721.7   | 5.0329  | 0.009835        | ** |
| maternal treatment in famliy            | 2  | 265      | 132.3    | 0.1789  | 0.836687        |    |
| Residuals                               | 55 | 40671    | 739.5    |         |                 |    |
| <b>DNA methyltransferase 1</b>          | Df | SS       | MS       | F value | Pr(>F)          |    |
| juvenile challenge                      | 2  | 8.17E-07 | 4.08E-07 | 3.5972  | 0.03403         | *  |

|                                                     |    |           |          |         |                  |     |
|-----------------------------------------------------|----|-----------|----------|---------|------------------|-----|
| maternal treatment                                  | 1  | 1.45E-07  | 1.45E-07 | 1.2772  | 0.26333          |     |
| juvenile challenge * maternal treatment             | 2  | 5.01E-07  | 2.50E-07 | 2.2042  | 0.11999          |     |
| maternal treatment in famliy                        | 2  | 3.88E-07  | 1.94E-07 | 1.7106  | 0.19024          |     |
| Residuals                                           | 55 | 6.24E-06  | 1.14E-07 |         |                  |     |
| <b>Elongation Factor 1</b>                          | Df | SS        | MS       | F value | Pr(>F)           |     |
| juvenile challenge                                  | 2  | 4.96E-06  | 2.48E-06 | 1.9312  | 0.1547           |     |
| maternal treatment                                  | 1  | 1.21E-06  | 1.21E-06 | 0.9433  | 0.3357           |     |
| juvenile challenge * maternal treatment             | 2  | 4.51E-06  | 2.25E-06 | 1.7535  | 0.1827           |     |
| maternal treatment in famliy                        | 2  | 7.64E-07  | 3.82E-07 | 0.2974  | 0.7439           |     |
| Residuals                                           | 55 | 7.07E-05  | 1.28E-06 |         |                  |     |
| <b>Early growth response protein 1</b>              | Df | SS        | MS       | F value | Pr(>F)           |     |
| juvenile challenge                                  | 2  | 1.11E-06  | 5.55E-07 | 5.8303  | <b>0.005053</b>  | **  |
| maternal treatment                                  | 1  | 5.14E-07  | 5.14E-07 | 5.4019  | <b>0.023836</b>  | *   |
| juvenile challenge * maternal treatment             | 2  | 7.61E-07  | 3.81E-07 | 4.0009  | 0.023865         | *   |
| maternal treatment in famliy                        | 2  | 6.92E-08  | 3.46E-08 | 0.3638  | 0.696697         |     |
| Residuals                                           | 55 | 5.23E-06  | 9.51E-08 |         |                  |     |
| <b>Euchromatic histone lysine methyltransferase</b> |    |           |          |         |                  |     |
| juvenile challenge                                  | 2  | 345       | 173      | 0.0339  | 0.9666987        |     |
| maternal treatment                                  | 1  | 60038     | 60038    | 11.7949 | <b>0.0011364</b> | **  |
| juvenile challenge * maternal treatment             | 2  | 30874     | 15437    | 3.0327  | 0.0563113        | .   |
| maternal treatment in famliy                        | 2  | 92088     | 46044    | 9.0456  | 0.0004015        | *** |
| Residuals                                           | 55 | 279960    | 5090     |         |                  |     |
| <b>Coagulation factor II / Thrombin</b>             | Df | SS        | MS       | F value | Pr(>F)           |     |
| juvenile challenge                                  | 2  | 0.0002352 | 1.18E-04 | 1.0439  | 0.3589           |     |
| maternal treatment                                  | 1  | 0.0002173 | 2.17E-04 | 1.929   | 0.1705           |     |
| juvenile challenge * maternal treatment             | 2  | 0.00022   | 1.10E-04 | 0.9763  | 0.3831           |     |
| maternal treatment in famliy                        | 2  | 0.0000556 | 2.78E-05 | 0.2468  | 0.7822           |     |
| Residuals                                           | 55 | 0.0061971 | 1.13E-04 |         |                  |     |
| <b>FAM60 A Protein</b>                              | Df | SS        | MS       | F value | Pr(>F)           |     |
| juvenile challenge                                  | 2  | 7.64E-06  | 3.82E-06 | 2.1676  | 0.12413          |     |
| maternal treatment                                  | 1  | 1.05E-05  | 1.05E-05 | 5.9375  | 0.01809          | *   |
| juvenile challenge * maternal treatment             | 2  | 3.72E-07  | 1.86E-07 | 0.1056  | 0.90001          |     |
| maternal treatment in famliy                        | 2  | 1.32E-05  | 6.60E-06 | 3.7471  | 0.02981          | *   |
| Residuals                                           | 55 | 9.69E-05  | 1.76E-06 |         |                  |     |
| <b>Fc fragment of IgL</b>                           | Df | SS        | MS       | F value | Pr(>F)           |     |
| juvenile challenge                                  | 2  | 119755    | 59878    | 3.4454  | 0.038926         | *   |
| maternal treatment                                  | 1  | 40687     | 40687    | 2.3412  | 0.131725         |     |
| juvenile challenge * maternal treatment             | 2  | 60996     | 30498    | 1.7549  | 0.18247          |     |
| maternal treatment in famliy                        | 2  | 284040    | 142020   | 8.172   | 0.000781         | *** |
| Residuals                                           | 55 | 955836    | 17379    |         |                  |     |
| <b>Growth hormone releasing hormone</b>             | Df | SS        | MS       | F value | Pr(>F)           |     |
| juvenile challenge                                  | 2  | 846       | 423.1    | 0.0967  | 0.908            |     |
| maternal treatment                                  | 1  | 1127      | 1126.8   | 0.2575  | 0.6139           |     |
| juvenile challenge * maternal treatment             | 2  | 6027      | 3013.3   | 0.6887  | 0.5065           |     |
| maternal treatment in famliy                        | 2  | 17113     | 8556.3   | 1.9555  | 0.1512           |     |
| Residuals                                           | 55 | 240657    | 4375.6   |         |                  |     |

| <b>Trypsin I</b>                                | Df | SS         | MS       | F value | Pr(>F)  |   |
|-------------------------------------------------|----|------------|----------|---------|---------|---|
| juvenile challenge                              | 2  | 31182      | 15591    | 0.6033  | 0.5506  |   |
| maternal treatment                              | 1  | 10737      | 10737    | 0.4155  | 0.5219  |   |
| juvenile challenge * maternal treatment         | 2  | 40714      | 20357    | 0.7877  | 0.46    |   |
| maternal treatment in famliy                    | 2  | 106658     | 53329    | 2.0635  | 0.1367  |   |
| Residuals                                       | 55 | 1421418    | 25844    |         |         |   |
| <b>Histone deacetylase</b>                      | Df | SS         | MS       | F value | Pr(>F)  |   |
| juvenile challenge                              | 2  | 8.01E-07   | 4.00E-07 | 1.2218  | 0.3026  |   |
| maternal treatment                              | 1  | 2.50E-09   | 2.51E-09 | 0.0077  | 0.9306  |   |
| juvenile challenge * maternal treatment         | 2  | 1.98E-07   | 9.90E-08 | 0.3021  | 0.7405  |   |
| maternal treatment in famliy                    | 2  | 4.08E-07   | 2.04E-07 | 0.623   | 0.5401  |   |
| Residuals                                       | 55 | 1.80E-05   | 3.28E-07 |         |         |   |
| <b>Histone demethylase</b>                      | Df | SS         | MS       | F value | Pr(>F)  |   |
| juvenile challenge                              | 2  | 1.82E-07   | 9.10E-08 | 3.646   | 0.03259 | * |
| maternal treatment                              | 1  | 2.26E-08   | 2.26E-08 | 0.9064  | 0.34525 |   |
| juvenile challenge * maternal treatment         | 2  | 6.15E-08   | 3.07E-08 | 1.2316  | 0.29973 |   |
| maternal treatment in famliy                    | 2  | 1.80E-07   | 9.00E-08 | 3.6069  | 0.03374 | * |
| Residuals                                       | 55 | 1.37E-06   | 2.49E-08 |         |         |   |
| <b>Hepcidin</b>                                 | Df | SS         | MS       | F value | Pr(>F)  |   |
| juvenile challenge                              | 2  | 11.794     | 5.897    | 3.4361  | 0.03925 | * |
| maternal treatment                              | 1  | 0.973      | 0.9727   | 0.5668  | 0.45476 |   |
| juvenile challenge * maternal treatment         | 2  | 0.734      | 0.3671   | 0.2139  | 0.80809 |   |
| maternal treatment in famliy                    | 2  | 15.733     | 7.8667   | 4.5838  | 0.01441 | * |
| Residuals                                       | 55 | 94.391     | 1.7162   |         |         |   |
| <b>Major histocompatibility complex II beta</b> | Df | SS         | MS       | F value | Pr(>F)  |   |
| juvenile challenge                              | 2  | 2.65E-05   | 1.33E-05 | 2.5804  | 0.08489 | . |
| maternal treatment                              | 1  | 8.93E-07   | 8.93E-07 | 0.1738  | 0.67835 |   |
| juvenile challenge * maternal treatment         | 2  | 1.01E-05   | 5.04E-06 | 0.9825  | 0.38085 |   |
| maternal treatment in famliy                    | 2  | 7.05E-06   | 3.52E-06 | 0.6861  | 0.5078  |   |
| Residuals                                       | 55 | 2.82E-04   | 5.13E-06 |         |         |   |
| <b>Heat shock protein 60</b>                    | Df | SS         | MS       | F value | Pr(>F)  |   |
| juvenile challenge                              | 2  | 0.00001417 | 7.09E-06 | 0.9609  | 0.3889  |   |
| maternal treatment                              | 1  | 0.0000002  | 1.99E-07 | 0.027   | 0.87    |   |
| juvenile challenge * maternal treatment         | 2  | 0.00000883 | 4.41E-06 | 0.5986  | 0.5531  |   |
| maternal treatment in famliy                    | 2  | 0.00000115 | 5.75E-07 | 0.078   | 0.925   |   |
| Residuals                                       | 55 | 0.00040561 | 7.37E-06 |         |         |   |
| <b>Heat shock protein 70</b>                    | Df | SS         | MS       | F value | Pr(>F)  |   |
| juvenile challenge                              | 2  | 1.20E-07   | 6.02E-08 | 1.1526  | 0.3233  |   |
| maternal treatment                              | 1  | 3.98E-08   | 3.98E-08 | 0.7614  | 0.3867  |   |
| juvenile challenge * maternal treatment         | 2  | 1.33E-07   | 6.64E-08 | 1.2714  | 0.2885  |   |
| maternal treatment in famliy                    | 2  | 1.77E-07   | 8.86E-08 | 1.6962  | 0.1928  |   |
| Residuals                                       | 55 | 2.87E-06   | 5.22E-08 |         |         |   |
| <b>Heat shock protein 90</b>                    | Df | SS         | MS       | F value | Pr(>F)  |   |
| juvenile challenge                              | 2  | 2.171      | 1.08536  | 1.1168  | 0.3346  |   |
| maternal treatment                              | 1  | 2.12       | 2.12009  | 2.1815  | 0.1454  |   |
| juvenile challenge * maternal treatment         | 2  | 1.908      | 0.95387  | 0.9815  | 0.3812  |   |

|                                                       |    |          |           |         |                 |     |
|-------------------------------------------------------|----|----------|-----------|---------|-----------------|-----|
| maternal treatment in famliy                          | 2  | 1.224    | 0.61182   | 0.6295  | 0.5366          |     |
| Residuals                                             | 55 | 53.452   | 0.97185   |         |                 |     |
| <b>Immunoglobulin light chain</b>                     | Df | SS       | MS        | F value | Pr(>F)          |     |
| juvenile challenge                                    | 2  | 2.71E-07 | 1.36E-07  | 1.6262  | 0.2059795       |     |
| maternal treatment                                    | 1  | 1.60E-06 | 1.60E-06  | 19.2101 | <b>5.32E-05</b> | *** |
| juvenile challenge * maternal treatment               | 2  | 4.00E-07 | 2.00E-07  | 2.3942  | 0.1006957       |     |
| maternal treatment in famliy                          | 2  | 1.31E-06 | 6.56E-07  | 7.8573  | 0.0009965       | *** |
| Residuals                                             | 55 | 4.59E-06 | 8.34E-08  |         |                 |     |
| <b>Interleukin 10</b>                                 | Df | SS       | MS        | F value | Pr(>F)          |     |
| juvenile challenge                                    | 2  | 1031     | 516       | 0.0737  | 0.929074        |     |
| maternal treatment                                    | 1  | 35458    | 35458     | 5.0665  | <b>0.028409</b> | *   |
| juvenile challenge * maternal treatment               | 2  | 823      | 412       | 0.0588  | 0.942952        |     |
| maternal treatment in famliy                          | 2  | 75507    | 37754     | 5.3945  | 0.007257        | **  |
| Residuals                                             | 55 | 384920   | 6999      |         |                 |     |
| <b>Integrin alpha 2</b>                               | Df | SS       | MS        | F value | Pr(>F)          |     |
| juvenile challenge                                    | 2  | 5.96E-07 | 2.98E-07  | 3.8214  | 0.02793         | *   |
| maternal treatment                                    | 1  | 3.14E-07 | 3.14E-07  | 4.0231  | <b>0.04981</b>  | *   |
| juvenile challenge * maternal treatment               | 2  | 3.73E-07 | 1.87E-07  | 2.3949  | 0.10063         |     |
| maternal treatment in famliy                          | 2  | 7.17E-08 | 3.58E-08  | 0.4598  | 0.63382         |     |
| Residuals                                             | 55 | 4.29E-06 | 7.80E-08  |         |                 |     |
| <b>Latescidin 2</b>                                   | Df | SS       | MS        | F value | Pr(>F)          |     |
| juvenile challenge                                    | 2  | 3.977    | 1.98865   | 2.1419  | 0.1271          |     |
| maternal treatment                                    | 1  | 0.029    | 0.0294    | 0.0317  | 0.8594          |     |
| juvenile challenge * maternal treatment               | 2  | 0.223    | 0.11174   | 0.1204  | 0.8868          |     |
| maternal treatment in famliy                          | 2  | 2.68     | 1.34008   | 1.4434  | 0.2449          |     |
| Residuals                                             | 55 | 51.064   | 0.92844   |         |                 |     |
| <b>Lymphocyte cytosolic factor I</b>                  | Df | SS       | MS        | F value | Pr(>F)          |     |
| juvenile challenge                                    | 2  | 6.43E-07 | 3.22E-07  | 3.1745  | 0.04957         | *   |
| maternal treatment                                    | 1  | 2.00E-10 | 2.00E-10  | 0.0019  | 0.96499         |     |
| juvenile challenge * maternal treatment               | 2  | 6.27E-07 | 3.13E-07  | 3.0921  | 0.05338         | .   |
| maternal treatment in famliy                          | 2  | 3.50E-07 | 1.75E-07  | 1.727   | 0.18732         |     |
| Residuals                                             | 55 | 5.57E-06 | 1.01E-07  |         |                 |     |
| <b>Lectine</b>                                        | Df | SS       | MS        | F value | Pr(>F)          |     |
| juvenile challenge                                    | 2  | 0.0645   | 0.03225   | 1.2568  | 0.2926          |     |
| maternal treatment                                    | 1  | 0.02084  | 0.020838  | 0.8121  | 0.3714          |     |
| juvenile challenge * maternal treatment               | 2  | 0.05285  | 0.026424  | 1.0298  | 0.3639          |     |
| maternal treatment in famliy                          | 2  | 0.00569  | 0.002845  | 0.1109  | 0.8953          |     |
| Residuals                                             | 55 | 1.4113   | 0.02566   |         |                 |     |
| <b>Lysine specific demethylase</b>                    | Df | SS       | MS        | F value | Pr(>F)          |     |
| juvenile challenge                                    | 2  | 1.51E-06 | 7.55E-07  | 4.5929  | 0.0143          | *   |
| maternal treatment                                    | 1  | 6.81E-07 | 6.81E-07  | 4.142   | <b>0.04666</b>  | *   |
| juvenile challenge * maternal treatment               | 2  | 1.14E-06 | 5.68E-07  | 3.4515  | <b>0.03872</b>  | *   |
| maternal treatment in famliy                          | 2  | 3.88E-07 | 1.94E-07  | 1.1783  | 0.31546         |     |
| Residuals                                             | 55 | 9.05E-06 | 1.64E-07  |         |                 |     |
| <b>Major histocompatibility complex I antigen F10</b> | Df | SS       | MS        | F value | Pr(>F)          |     |
| juvenile challenge                                    | 2  | 0.002835 | 0.0014175 | 0.5325  | 0.59013         |     |

|                                         |    |           |            |         |                  |     |
|-----------------------------------------|----|-----------|------------|---------|------------------|-----|
| maternal treatment                      | 1  | 0.009762  | 0.0097616  | 3.667   | 0.06071          | .   |
| juvenile challenge * maternal treatment | 2  | 0.004441  | 0.0022203  | 0.8341  | 0.4397           |     |
| maternal treatment in famliy            | 2  | 0.018393  | 0.0091963  | 3.4546  | 0.03861          | *   |
| Residuals                               | 55 | 0.146412  | 0.002662   |         |                  |     |
| <b>Myogenic regulatory factors</b>      | Df | SS        | MS         | F value | Pr(>F)           |     |
| juvenile challenge                      | 2  | 0.0001453 | 0.00007266 | 0.869   | 0.42504          |     |
| maternal treatment                      | 1  | 0.0003696 | 0.00036964 | 4.4208  | <b>0.04009</b>   | *   |
| juvenile challenge * maternal treatment | 2  | 0.0003167 | 0.00015837 | 1.894   | 0.16015          |     |
| maternal treatment in famliy            | 2  | 0.0001833 | 0.00009165 | 1.0961  | 0.34137          |     |
| Residuals                               | 55 | 0.0045988 | 0.00008362 |         |                  |     |
| <b>Opsin 1</b>                          | Df | SS        | MS         | F value | Pr(>F)           |     |
| juvenile challenge                      | 2  | 0.0002315 | 1.16E-04   | 1.959   | 0.15071          |     |
| maternal treatment                      | 1  | 0.0000022 | 2.17E-06   | 0.0367  | 0.84871          |     |
| juvenile challenge * maternal treatment | 2  | 0.00002   | 1.00E-05   | 0.1696  | 0.84442          |     |
| maternal treatment in famliy            | 2  | 0.00029   | 1.45E-04   | 2.4547  | 0.09525          | .   |
| Residuals                               | 55 | 0.0032494 | 5.91E-05   |         |                  |     |
| <b>Proprotein convertase subtilisin</b> | Df | SS        | MS         | F value | Pr(>F)           |     |
| juvenile challenge                      | 2  | 1.94E-07  | 9.72E-08   | 0.8877  | 0.4174           |     |
| maternal treatment                      | 1  | 2.35E-07  | 2.35E-07   | 2.1443  | 0.1488           |     |
| juvenile challenge * maternal treatment | 2  | 1.65E-07  | 8.25E-08   | 0.7539  | 0.4753           |     |
| maternal treatment in famliy            | 2  | 1.91E-07  | 9.56E-08   | 0.8733  | 0.4233           |     |
| Residuals                               | 55 | 6.02E-06  | 1.09E-07   |         |                  |     |
| <b>Pentraxin 4</b>                      | Df | SS        | MS         | F value | Pr(>F)           |     |
| juvenile challenge                      | 2  | 24494     | 12247      | 1.31    | 0.2781153        |     |
| maternal treatment                      | 1  | 40270     | 40270      | 4.3074  | <b>0.0426355</b> | *   |
| juvenile challenge * maternal treatment | 2  | 20868     | 10434      | 1.1161  | 0.3348692        |     |
| maternal treatment in famliy            | 2  | 157587    | 78793      | 8.428   | 0.0006415        | *** |
| Residuals                               | 55 | 514193    | 9349       |         |                  |     |
| <b>Ribosomal protein A3</b>             | Df | SS        | MS         | F value | Pr(>F)           |     |
| juvenile challenge                      | 2  | 6.64E-06  | 3.32E-06   | 1.4962  | 0.233            |     |
| maternal treatment                      | 1  | 8.34E-07  | 8.34E-07   | 0.3755  | 0.5426           |     |
| juvenile challenge * maternal treatment | 2  | 3.27E-07  | 1.63E-07   | 0.0736  | 0.9292           |     |
| maternal treatment in famliy            | 2  | 2.00E-06  | 9.99E-07   | 0.4499  | 0.64             |     |
| Residuals                               | 55 | 1.22E-04  | 2.22E-06   |         |                  |     |
| <b>Serum amyloid A</b>                  | Df | SS        | MS         | F value | Pr(>F)           |     |
| juvenile challenge                      | 2  | 0.0005022 | 0.00025112 | 2.0249  | 0.14173          |     |
| maternal treatment                      | 1  | 0.0000798 | 0.00007978 | 0.6433  | 0.42595          |     |
| juvenile challenge * maternal treatment | 2  | 0.0000617 | 0.00003086 | 0.2489  | 0.78057          |     |
| maternal treatment in famliy            | 2  | 0.0007723 | 0.00038613 | 3.1136  | 0.05236          | .   |
| Residuals                               | 55 | 0.0068208 | 0.00012401 |         |                  |     |
| <b>Tumor necrose factor beta</b>        | Df | SS        | MS         | F value | Pr(>F)           |     |
| juvenile challenge                      | 2  | 5.20E-08  | 2.60E-08   | 0.7422  | 0.480765         |     |
| maternal treatment                      | 1  | 3.25E-07  | 3.25E-07   | 9.2896  | <b>0.003538</b>  | **  |
| juvenile challenge * maternal treatment | 2  | 2.34E-07  | 1.17E-07   | 3.3377  | 0.042846         | *   |
| maternal treatment in famliy            | 2  | 7.71E-08  | 3.86E-08   | 1.1017  | 0.339511         |     |
| Residuals                               | 55 | 1.93E-06  | 3.50E-08   |         |                  |     |
