# Supplementary material for: Parental investment matters for maternal and offspring immune defense in the mouthbrooding cichlid Astatotilapia burtoni
Source: PubMed Central journal article supplement (PMC5738712; doi:10.1186/s12862-017-1109-6), 2017-12-20
Supplement: 12862_2017_1109_MOESM8_ESM.pdf [file 12862_2017_1109_MOESM8_ESM.pdf]

**S8 Table: Tukey HSD test on candidate genes from mouthbred juveniles:** Posthoc test following significant results from two-way ANCOVA. P-values marked in bold are in agreement with the results from the univariate analysis.

**Interactive effects between maternal and juvenile treatment**

**Estrogen receptor B**

|                                                 | female naive : juvenile naive (fN : jN) |         |        |               | female Vibrio : juvenil naive (FV : jN) |         |        |               |
|-------------------------------------------------|-----------------------------------------|---------|--------|---------------|-----------------------------------------|---------|--------|---------------|
|                                                 | diff                                    | lower   | upper  | p value       | diff                                    | lower   | upper  | p value       |
| female naive : juvenile naive (fN : jN)         |                                         |         |        |               |                                         |         |        |               |
| female Vibrio : juvenil naive (FV : jN)         | 18.13                                   | -83.05  | 46.79  | 0.9619        |                                         |         |        |               |
| female naive : juvenile Tenacibacter (fN : jT)  | 33.49                                   | -96.84  | 29.86  | 0.6283        | 15.36                                   | -49.56  | 80.28  | 0.9815        |
| female Vibrio : juvenile Tenacibacter (fV : jT) | 28.16                                   | -94.94  | 38.62  | 0.8136        | 10.03                                   | -78.29  | 58.24  | 0.9980        |
| female naive : juvenile Vibrio (fN : jV)        | 22.84                                   | -82.70  | 37.03  | 0.8690        | 4.71                                    | -56.81  | 66.22  | 0.9999        |
| female Vibrio : juvenile Vibrio (fN : jN)       | 99.41                                   | -168.45 | -30.38 | <b>0.0011</b> | 81.28                                   | -151.76 | -10.81 | <b>0.0149</b> |

|                                                 | female naive : juvenile Tenacibacter (fN : jT) |         |       |         | female Vibrio : juvenile Tenacibacter (fV : jT) |         |       |         |
|-------------------------------------------------|------------------------------------------------|---------|-------|---------|-------------------------------------------------|---------|-------|---------|
|                                                 | diff                                           | lower   | upper | p value | diff                                            | lower   | upper | p value |
| female naive : juvenile naive (fN : jN)         |                                                |         |       |         |                                                 |         |       |         |
| female Vibrio : juvenil naive (FV : jN)         |                                                |         |       |         |                                                 |         |       |         |
| female naive : juvenile Tenacibacter (fN : jT)  |                                                |         |       |         |                                                 |         |       |         |
| female Vibrio : juvenile Tenacibacter (fV : jT) | 5.33                                           | -61.45  | 72.11 | 0.9999  |                                                 |         |       |         |
| female naive : juvenile Vibrio (fN : jV)        | 10.65                                          | -49.21  | 70.52 | 0.9950  | 5.32                                            | -68.80  | 58.16 | 0.9999  |
| female Vibrio : juvenile Vibrio (fN : jN)       | 65.92                                          | -134.96 | 3.11  | 0.0693  | 71.26                                           | -143.45 | 0.94  | 0.0550  |

|                                                 | female naive : juvenile Vibrio (fN : jV) |         |        |               |
|-------------------------------------------------|------------------------------------------|---------|--------|---------------|
|                                                 | diff                                     | lower   | upper  | p value       |
| female naive : juvenile naive (fN : jN)         |                                          |         |        |               |
| female Vibrio : juvenil naive (FV : jN)         |                                          |         |        |               |
| female naive : juvenile Tenacibacter (fN : jT)  |                                          |         |        |               |
| female Vibrio : juvenile Tenacibacter (fV : jT) |                                          |         |        |               |
| female naive : juvenile Vibrio (fN : jV)        |                                          |         |        |               |
| female Vibrio : juvenile Vibrio (fN : jN)       | 76.58                                    | -142.43 | -10.73 | <b>0.0137</b> |

**Complement component 1a**

female naive : juvenile naive (fN : jN)  
 female Vibrio : juvenil naive (FV : jN)  
 female naive : juvenile Tenacibacter (fN : jT)  
 female Vibrio : juvenile Tenacibacter (fV : jT)  
 female naive : juvenile Vibrio (fN : jV)  
 female Vibrio : juvenile Vibrio (fN : jN)

| female naive : juvenile naive (fN : jN) |           |           |               | female Vibrio : juvenil naive (FV : jN) |           |           |               |
|-----------------------------------------|-----------|-----------|---------------|-----------------------------------------|-----------|-----------|---------------|
| diff                                    | lower     | upper     | p value       | diff                                    | lower     | upper     | p value       |
| 1.81E-04                                | -7.19E-04 | 3.56E-04  | 0.9180        |                                         |           |           |               |
| 4.79E-04                                | -1.00E-03 | 4.51E-05  | 0.0920        | 2.98E-04                                | -2.39E-04 | 8.36E-04  | 0.5787        |
| 1.23E-04                                | -6.76E-04 | 4.30E-04  | 0.9859        | 5.81E-05                                | -5.07E-04 | 6.23E-04  | 0.9996        |
| 1.95E-04                                | -6.90E-04 | 3.01E-04  | 0.8539        | 1.37E-05                                | -4.96E-04 | 5.23E-04  | 1.0000        |
| 8.15E-04                                | -1.39E-03 | -2.43E-04 | <b>0.0013</b> | 6.33E-04                                | -1.22E-03 | -5.01E-05 | <b>0.0258</b> |

female naive : juvenile naive (fN : jN)  
 female Vibrio : juvenil naive (FV : jN)  
 female naive : juvenile Tenacibacter (fN : jT)  
 female Vibrio : juvenile Tenacibacter (fV : jT)  
 female naive : juvenile Vibrio (fN : jV)  
 female Vibrio : juvenile Vibrio (fN : jN)

| female naive : juvenile Tenacibacter (fN : jT) |           |          |         | female Vibrio : juvenile Tenacibacter (fV : jT) |           |           |               |
|------------------------------------------------|-----------|----------|---------|-------------------------------------------------|-----------|-----------|---------------|
| diff                                           | lower     | upper    | p value | diff                                            | lower     | upper     | p value       |
|                                                |           |          |         |                                                 |           |           |               |
| 3.56E-04                                       | -1.97E-04 | 9.09E-04 | 0.4125  |                                                 |           |           |               |
| 2.84E-04                                       | -2.11E-04 | 7.80E-04 | 0.5422  | 7.18E-05                                        | -4.54E-04 | 5.97E-04  | 0.9986        |
| 3.35E-04                                       | -9.07E-04 | 2.36E-04 | 0.5182  | 6.92E-04                                        | -1.29E-03 | -9.39E-05 | <b>0.0144</b> |

female naive : juvenile naive (fN : jN)  
 female Vibrio : juvenil naive (FV : jN)  
 female naive : juvenile Tenacibacter (fN : jT)  
 female Vibrio : juvenile Tenacibacter (fV : jT)  
 female naive : juvenile Vibrio (fN : jV)  
 female Vibrio : juvenile Vibrio (fN : jN)

| female naive : juvenile Vibrio (fN : jV) |           |           |               |
|------------------------------------------|-----------|-----------|---------------|
| diff                                     | lower     | upper     | p value       |
|                                          |           |           |               |
| 6.20E-04                                 | -1.16E-03 | -7.46E-05 | <b>0.0170</b> |

**Lysine specific demethylase**

female naive : juvenile naive (fN : jN)  
 female Vibrio : juvenil naive (FV : jN)  
 female naive : juvenile Tenacibacter (fN : jT)  
 female Vibrio : juvenile Tenacibacter (fV : jT)  
 female naive : juvenile Vibrio (fN : jV)  
 female Vibrio : juvenile Vibrio (fN : jN)

| female naive : juvenile naive (fN : jN) |           |           |               | female Vibrio : juvenil naive (FV : jN) |           |           |               |
|-----------------------------------------|-----------|-----------|---------------|-----------------------------------------|-----------|-----------|---------------|
| diff                                    | lower     | upper     | p value       | diff                                    | lower     | upper     | p value       |
| 1.23E-04                                | -6.47E-04 | 4.01E-04  | 0.9820        |                                         |           |           |               |
| 3.14E-04                                | -8.25E-04 | 1.98E-04  | 0.4689        | 1.90E-04                                | -3.34E-04 | 7.15E-04  | 0.8906        |
| 2.39E-04                                | -7.78E-04 | 3.00E-04  | 0.7797        | 1.16E-04                                | -6.67E-04 | 4.35E-04  | 0.9891        |
| 2.21E-04                                | -7.05E-04 | 2.62E-04  | 0.7557        | 9.82E-05                                | -3.99E-04 | 5.95E-04  | 0.9918        |
| 8.01E-04                                | -1.36E-03 | -2.43E-04 | <b>0.0011</b> | 6.78E-04                                | -1.25E-03 | -1.09E-04 | <b>0.0108</b> |

female naive : juvenile naive (fN : jN)  
 female Vibrio : juvenil naive (FV : jN)  
 female naive : juvenile Tenacibacter (fN : jT)  
 female Vibrio : juvenile Tenacibacter (fV : jT)  
 female naive : juvenile Vibrio (fN : jV)  
 female Vibrio : juvenile Vibrio (fN : jN)

| female naive : juvenile Tenacibacter (fN : jT) |           |          |         | female Vibrio : juvenile Tenacibacter (fV : jT) |           |          |               |
|------------------------------------------------|-----------|----------|---------|-------------------------------------------------|-----------|----------|---------------|
| diff                                           | lower     | upper    | p value | diff                                            | lower     | upper    | p value       |
|                                                |           |          |         |                                                 |           |          |               |
| 7.46E-05                                       | -4.65E-04 | 6.14E-04 | 0.9985  |                                                 |           |          |               |
| 9.23E-05                                       | -3.91E-04 | 5.76E-04 | 0.9930  | 1.77E-05                                        | -5.30E-04 | 4.95E-04 | 1.0000        |
| 4.87E-04                                       | -1.04E-03 | 7.02E-05 | 0.1197  | 5.62E-04                                        | -1.14E-03 | 2.12E-05 | <b>0.0651</b> |

female naive : juvenile naive (fN : jN)  
 female Vibrio : juvenil naive (FV : jN)  
 female naive : juvenile Tenacibacter (fN : jT)  
 female Vibrio : juvenile Tenacibacter (fV : jT)  
 female naive : juvenile Vibrio (fN : jV)  
 female Vibrio : juvenile Vibrio (fN : jN)

| female naive : juvenile Vibrio (fN : jV) |           |           |               |
|------------------------------------------|-----------|-----------|---------------|
| diff                                     | lower     | upper     | p value       |
|                                          |           |           |               |
| 5.80E-04                                 | -1.11E-03 | -4.78E-05 | <b>0.0250</b> |

Effects of the single factor "juvenile treatment"

Calreticulin 1

|               | Control (PBS) |        |       |               | Tenebacter |        |       |         |
|---------------|---------------|--------|-------|---------------|------------|--------|-------|---------|
|               | diff          | lower  | upper | p value       | diff       | lower  | upper | p value |
| Control (PBS) |               |        |       |               |            |        |       |         |
| Tenacibacter  | -23.60        | -57.90 | 10.69 | 0.2310        |            |        |       |         |
| Vibrio        | -34.83        | -68.32 | -1.34 | <b>0.0398</b> | -11.23     | -45.14 | 22.69 | 0.7065  |

Early growth response protein 1

|               | Control (PBS) |        |        |               | Tenebacter |        |       |         |
|---------------|---------------|--------|--------|---------------|------------|--------|-------|---------|
|               | diff          | lower  | upper  | p value       | diff       | lower  | upper | p value |
| Control (PBS) |               |        |        |               |            |        |       |         |
| Tenacibacter  | -29.84        | -68.85 | 9.16   | 0.1655        |            |        |       |         |
| Vibrio        | -54.01        | -92.10 | -15.93 | <b>0.0034</b> | -24.17     | -62.74 | 14.40 | 0.2948  |
